# Supplementary material
Source: PubMed Central journal article supplement (PMC3143619)
Supplement: supp_M111.253237_jbc.M111.253237-1.pdf [file supp_M111.253237_jbc.M111.253237-1.pdf]

Supplemental Data

**ENZYME REACTIVATION BY HYDROGEN PEROXIDE IN HEME-BASED  
TRYPTOPHAN DIOXYGENASE**

Rong Fu,<sup>†||</sup> Rupal Gupta,<sup>‡</sup> Jiafeng Geng,<sup>‡</sup> Kednerlin Dornevil,<sup>‡</sup> Siming Wang,<sup>‡</sup> Yong Zhang,<sup>§</sup>  
Michael P. Hendrich,<sup>‡</sup> and Aimin Liu<sup>\*†</sup>

*From <sup>†</sup>Department of Chemistry, Georgia State University, P. O. Box 4098, Atlanta, GA, 30303;*

*<sup>‡</sup>Department of Chemistry, Carnegie Mellon University, 4400 Fifth Avenue, Pittsburgh,*

*Pennsylvania 15213; and <sup>§</sup>Department of Chemistry, Chemical Biology, and Biomedical*

*Engineering, Stevens Institute of Technology, Castle Point on Hudson, Hoboken, New Jersey*

*07030*

|                                |         |
|--------------------------------|---------|
| 1. Figure S1 – S10 .....       | 2 - 11  |
| 2. Computational Details ..... | 12 - 13 |
| 3. Table S1 –S14 .....         | 14 - 37 |

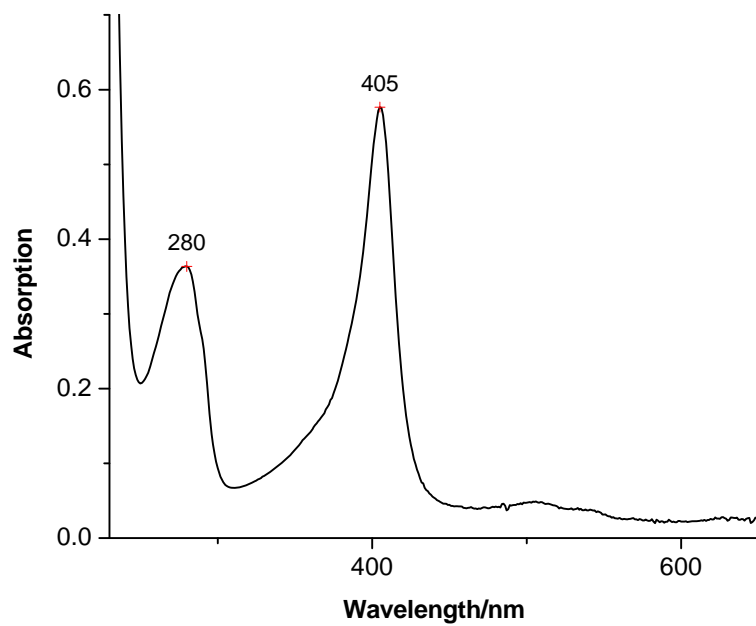

**Figure S1.** UV-Vis spectrum of as-isolated *Cupriavidus metallidurans* TDO (CmTDO).

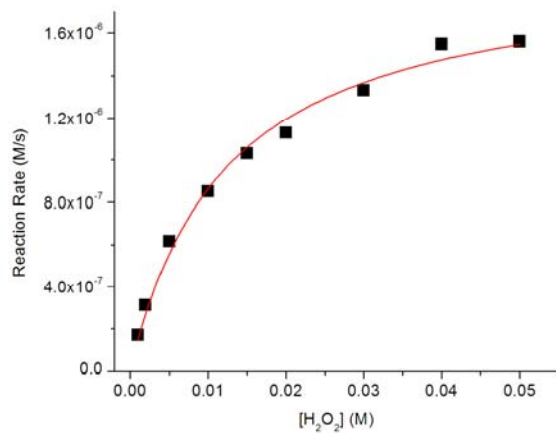

**Figure S2.** Top Panel: Saturation curve showing the relation between the concentration of H<sub>2</sub>O<sub>2</sub> and rate of the catalase-like activity of ferric TDO. Three repeating experiments were carried out and similar results were observed.

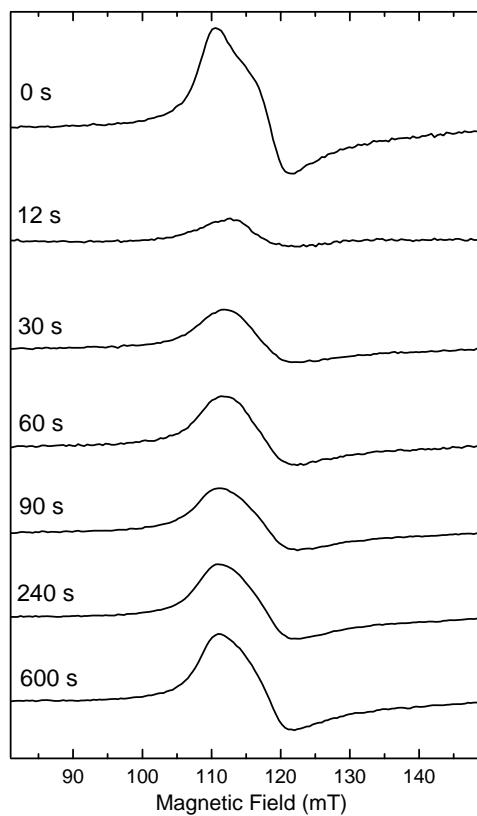

**Figure S3.** EPR spectra of the high-spin ferric heme ( $150\ \mu\text{M}$ ) taken during the reaction with  $\text{H}_2\text{O}_2$  ( $900\ \mu\text{M}$ ). EPR parameters: recording temperature, 10 K; microwave power, 1 mW; microwave frequency, 9.44 GHz; modulation amplitude, 0.8 mT.

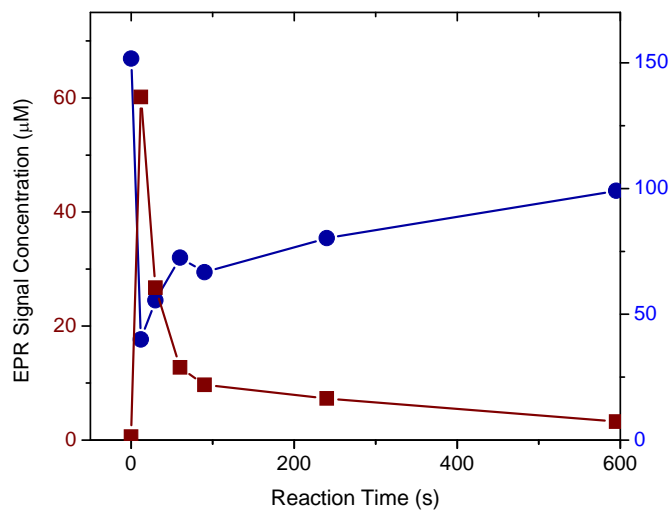

**Figure S4.** EPR signal intensity as a function of reaction time for the  $g = 2.0028$  (wine trace, ■) and  $g = 6$  (navy, ●) resonances, respectively. The initial heme concentration was 150  $\mu\text{M}$ .

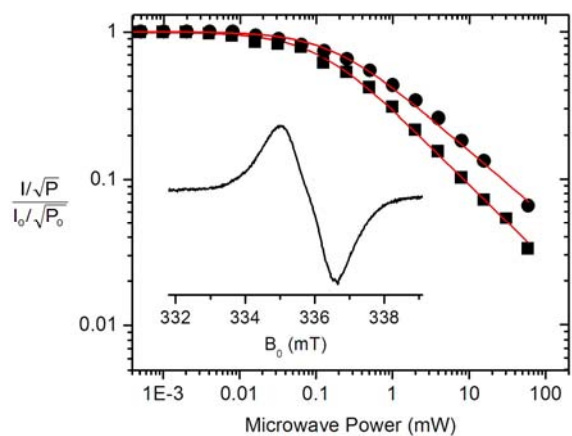

**Figure S5.** The  $g = 2.0028$  free radical (inset) and its relaxation properties. The power saturation of the 10 K (■) and 100 K (●) and the fit to Eq. 2 are shown, where  $I$  is the EPR signal amplitude and  $P$  is the microwave power.

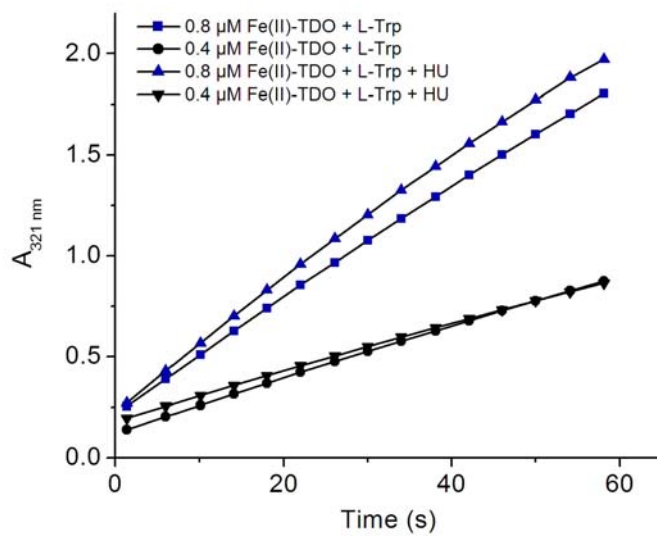

**Figure S6.** The effect of hydroxyurea (HU) on the enzymatic activity of ferrous TDO. Ferric TDO was treated with 2 equivalents of sodium dithionite and purged with argon for 15 min under anaerobic conditions. The reactions were conducted in O<sub>2</sub>-saturated buffer containing 5 mM L-Trp in the absence or presence of hydroxyurea (5 mM).

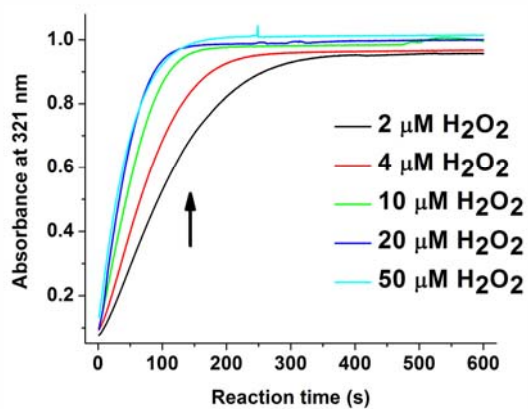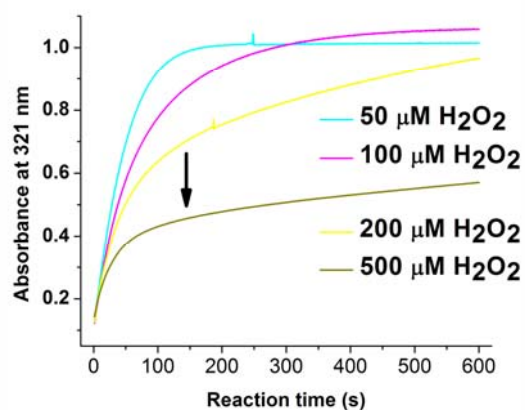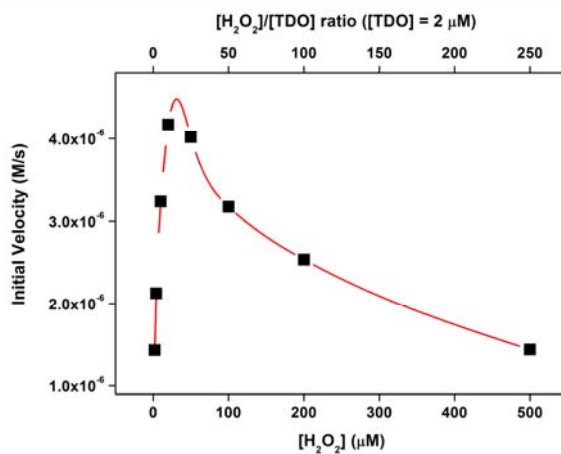

**Figure S7.** Optical spectra of TDO (2 μM) and L-Trp (5 mM) taken from the reaction with H<sub>2</sub>O<sub>2</sub> (Panel A: 2 – 50 μM, Panel B: 50 – 500 μM) under aerobic conditions. Panel C shows the Initial velocity as a function peroxide concentrations. Initial velocity of each set of experiment was counted within 20 - 40 s. High concentration of peroxide can inhibit the enzyme reactivation due to the oxidation of the newly generated ferrous TDO.



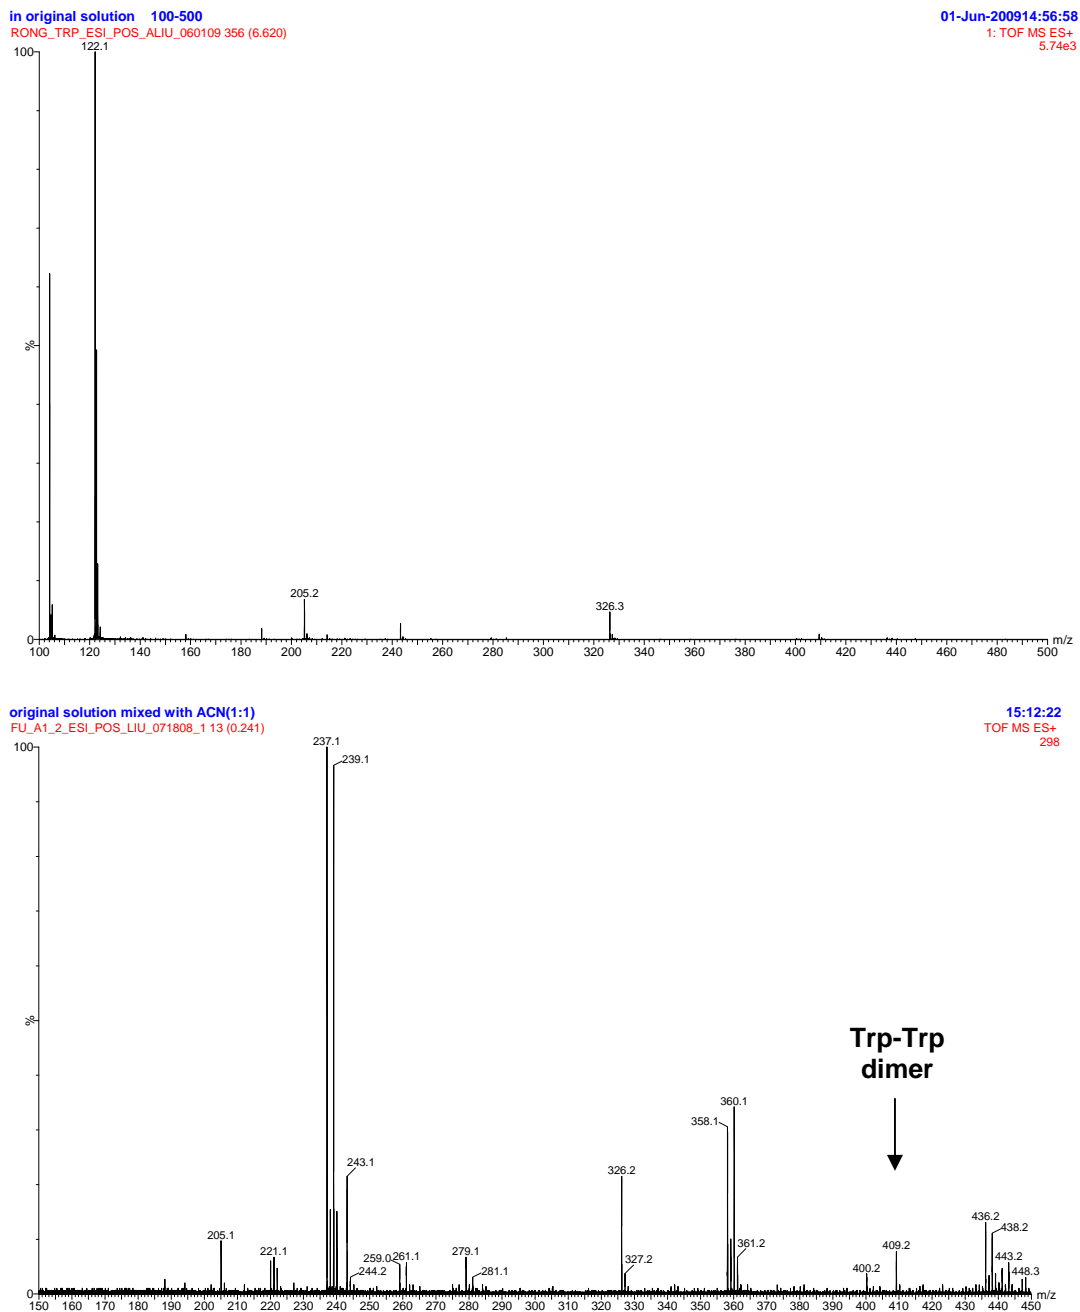

**Figure S8.** (A) 5 mM L-Trp in 50 mM Tris pH 7.4, (B) After reaction with H<sub>2</sub>O<sub>2</sub> (4 mM) in the presence of TDO (100 μM). The experimental details are described below. All the reagents were prepared using anaerobic 50 mM Tris-HCl pH 7.4 buffer in H<sub>2</sub><sup>18</sup>O (75% <sup>18</sup>O) which was bubbled and purged with argon for hours prior to the experiments. The reactions were performed on ice with stirring using septum-sealed reaction vials. Ferric TDO (100 μM) was allowed to react with H<sub>2</sub>O<sub>2</sub> in the presence of 5 mM L-Trp, in which H<sub>2</sub><sup>16</sup>O<sub>2</sub> was added to a total of 4 mM with a stepwise addition. After 20 minutes of reaction, TDO was removed from the reaction system using a Centriprep-10 at 3000×g for 10 min, and the filtrate was collected for electrospray ionization-mass spectrometry (ESI-MS) analysis.

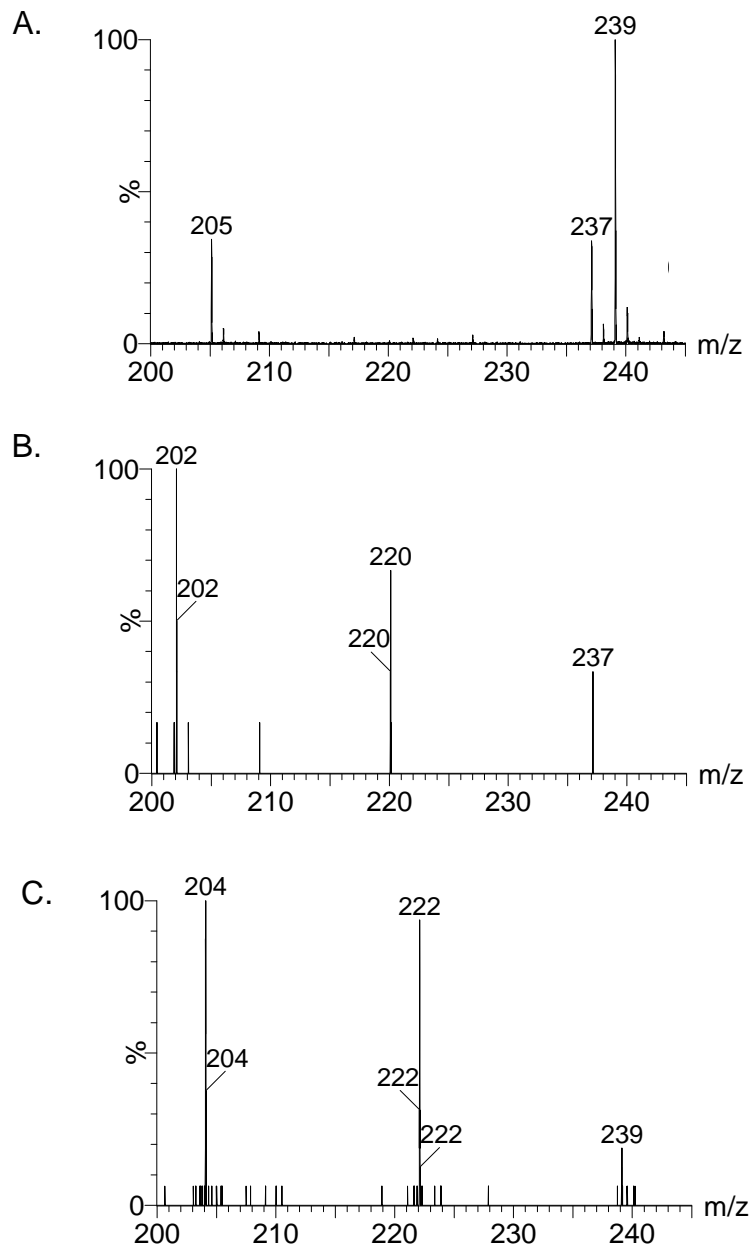

**Figure S9.** MS/MS analysis of  $m/z$  220 and  $m/z$  222 ion peaks. (A) ESI-MS spectrum of the TDO reaction in  $\text{H}_2^{18}\text{O}$  solvent. MS/MS characterization of ion peaks of  $m/z$  237 (B) and  $m/z$  239 (C) of the spectrum A, respectively.

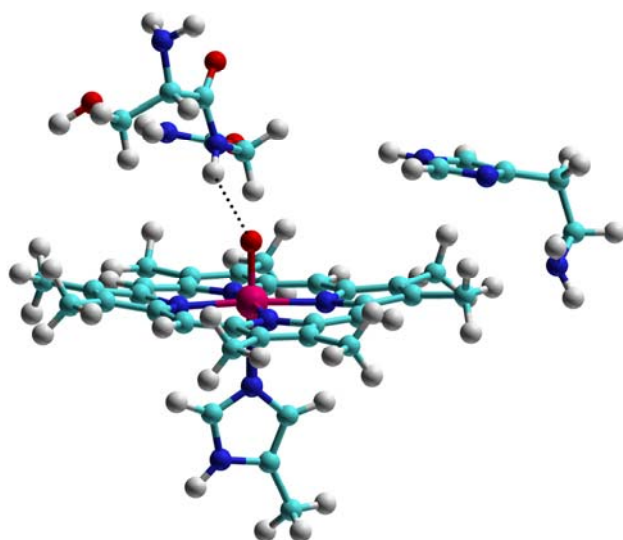

**Figure S10.** An active site structural model. Color schemes are as follows: Fe – pink, O – red, N – blue, C – cyan, and H – grey. The dashed lines connect the oxo group to the hydrogen atoms in Gly125 (*Cm*TDO amino acid numbering).

## Computational Details:

The  $^{57}\text{Fe}$  quadrupole splitting arises from the non-spherical nuclear charge distribution in the  $I^*=3/2$  excited state in the presence of an electric field gradient at the  $^{57}\text{Fe}$  nucleus, while the isomer shift arises from differences in the electron density at the nucleus between the absorber (the molecule or system of interest) and a reference compound (usually  $\alpha\text{-Fe}$  at 300K). The former effect is related to the components of the electric field gradient tensor at the nucleus as follows:<sup>1</sup>

$$\Delta E_Q = \frac{1}{2} eQV_{zz} \left( 1 + \frac{\eta^2}{3} \right)^{1/2} \quad (1)$$

where  $e$  is the electron charge,  $Q$  is the quadrupole moment of the  $E^*=14.4$  keV excited state, and the principal components of the EFG tensor are labeled according to the convention:

$$|V_{zz}| > |V_{yy}| > |V_{xx}| \quad (2)$$

with the asymmetry parameter being given by:

$$\eta = \frac{V_{xx} - V_{yy}}{V_{zz}} \quad (3)$$

The isomer shift in  $^{57}\text{Fe}$  Mössbauer spectroscopy is given by:<sup>1</sup>

$$\delta_{\text{Fe}} = E_A - E_{\text{Fe}} = \frac{2\pi}{3} Ze^2 \left( \langle R^2 \rangle^* - \langle R^2 \rangle \right) \left( |\psi(0)|_{\text{A}}^2 - |\psi(0)|_{\text{Fe}}^2 \right) \quad (4)$$

where  $Z$  represents the atomic number of the nucleus of interest (iron) and  $R$ ,  $R^*$  are average nuclear radii of the ground and excited states of  $^{57}\text{Fe}$ . Since  $|\psi(0)|_{\text{Fe}}^2$  is a constant, the isomer shift (from Fe) can be written as:

$$\delta_{\text{Fe}} = \alpha [ \rho(0) - c ] \quad (5)$$

where  $\alpha$  is the so-called calibration constant and  $\rho(0)$  is the computed charge density at the iron nucleus. Both  $\alpha$  and  $c$  can be obtained from the correlation between experimental  $\delta_{\text{Fe}}$  values and the corresponding computed  $\rho(0)$  data in a training set. Then, one can use equation (5) to predict  $\delta_{\text{Fe}}$  for a new molecule from its computed  $\rho(0)$ , basically as described in detail elsewhere for a wide variety of heme and other model systems.<sup>2</sup>

The hybrid functional B3LYP<sup>3</sup> with a Wachter's basis (62111111/3311111/3111) for Fe,<sup>4</sup> 6-311G\* for all the other heavy atoms and 6-31G\* for hydrogens in the *Gaussian 03* program<sup>5</sup> was used to predict Mössbauer quadrupole splittings and isomer shifts, the same approach used in the previous work for various iron-containing proteins and models.<sup>2,6</sup> To calculate  $\Delta E_Q$ , we first evaluated the principal components of the electric field gradient tensor at the  $^{57}\text{Fe}$  nucleus ( $V_{ii}$ ), then we used equation (1) to deduce  $\Delta E_Q$ , using a precise recent determination of  $Q = 0.16 (\pm 5\%) \times 10^{-28} \text{m}^2$ ,<sup>7</sup> a value previously found to permit excellent accord between theory and experiment in a broad range of systems.<sup>2,6</sup> In order to calculate  $\delta_{\text{Fe}}$  values, we read the wavefunctions from the *Gaussian 03* calculations into the AIM 2000 program,<sup>8</sup> to evaluate the charge density at the iron nucleus,  $\rho(0)$ . Then, we evaluated the isomer shifts by using the equation derived previously:<sup>2</sup>

$$\delta_{\text{Fe}} = -0.404 [ \rho(0) - 11614.16 ] \quad (6)$$

We considered numerous structural models pertaining to the axial ligands based on the examination of the X-ray crystal structures of TDO: 1) the His ligand in the substrate-free TDO structure (PDB ID: 2NW7) is twisted from a normal perpendicular position with respect to the heme ring; 2) the Ser124-Gly125 residues (*Cm*TDO amino acid numbering) are adjacent to the Fe center, and the amide proton of Gly125 is within hydrogen bonding distance to the Fe-oxo

with an H–oxo distance of ca. 2.2 Å; 3) the distal His residue is in the vicinity of the presumed oxo position; 4) the proximal His group has a water molecule hydrogen bonded to the N<sub>δ</sub> position in the substrate-bound TDO structure (PDB ID: 2NW8).

In all of these models, the heme group is represented by a porphyrin with original eight β substituents replaced by methyl groups and the axial His group is truncated to be 5-methylimidazole. Geometries of all of the structural models investigated in this work were first optimized (see Table S1-14 for the optimized coordinates) with the terminal atoms fixed at the x-ray crystal structure positions to mimic the protein environment effect, using the DFT method BPW91<sup>9</sup> with the Wachters' basis for Fe, 6-311G\* for other heavy atoms and 6-31G\* for hydrogens, which is the same approach used previously to investigate other oxoferryl species.<sup>6e</sup> Then, the Mössbauer properties of these optimized structures were calculated using above methods.

#### References cited in this supporting information:

- (1) Debrunner PG (1989). In *Iron Porphyrins*; Lever ABP, Gray HB, Eds.; VCH Publishers: New York, Vol. 3, pp.139-234.
- (2) Zhang Y, Mao J, Oldfield E (2002) *J. Am. Chem. Soc.* 124:7829-7839.
- (3) Becke AD (1993) *J. Chem. Phys.* 98:5648-5652.
- (4) Wachters AJ (1970) *J. Chem. Phys.* 52:1033-1036.  
<http://www.emsl.pnl.gov/forms/basisform.html>
- (5) Frisch MJ et al. (2004) Gaussian 03, Revision D.01; Gaussian, Inc., Wallingford CT.
- (6) a) Zhang Y, Mao J, Godbout N, Oldfield E (2002) *J. Am. Chem. Soc.* 124:13921-13930. b) Zhang Y, Gossman W, Oldfield E (2003) *J. Am. Chem. Soc.*, 125:16387-16396. c) Zhang Y, Oldfield E (2003) *J. Phys. Chem. B* 107:7180-7188. d) Zhang Y, Oldfield E (2003) *J. Phys. Chem. A*, 107:4147-4150. e) Zhang Y, Oldfield E (2004) *J. Am. Chem. Soc.* 126:4470-4471. f) Zhang Y, Oldfield E (2004) *J. Am. Chem. Soc.*, 126: 9494-9495.
- (7) Dufek P, Blaha P, Schwarz K (1995) *Phys. Rev. Lett.* 75:3545-3548.
- (8) (a) AIM2000, Version 1.0, written by Biegler-König F, University of Applied Science, Bielefeld, Germany. (b) Bader RFW (1990) *Atoms in Molecules: A Quantum Theory*; Oxford Univ. Press, Oxford.
- (9) (a) Becke AD (1988) *Phys. Rev. A* 38:3098-3100. (b) Perdew JP, Burke K, Wang Y (1996) *Phys. Rev. B* 54:16533-16539.

**Table S1.** Cartesian coordinates of model **1A**:  $\text{Fe}^{\text{IV}}(\text{Por})^{2-}(\text{His})^0(\text{O})^{2-}$ 

|    |               |               |               |
|----|---------------|---------------|---------------|
| C  | 0.9697073605  | -1.443107041  | 5.3149774343  |
| C  | 0.423302732   | -0.9158325501 | 4.0038868075  |
| N  | -0.6622375381 | -0.044044849  | 3.9714858185  |
| C  | 0.8399921705  | -0.9746954072 | 2.6846263664  |
| C  | -0.8558118333 | 0.3693917604  | 2.684803842   |
| N  | 0.0415942555  | -0.1758558336 | 1.8773328397  |
| H  | 0.1608397914  | -1.6998089826 | 5.9984526489  |
| H  | 1.6137985698  | -2.3072903699 | 5.1511308963  |
| H  | -1.2255767929 | 0.2322583145  | 4.7719063027  |
| H  | 1.667592403   | -1.5387990973 | 2.261187464   |
| H  | -1.6525386162 | 1.0421801856  | 2.3782206034  |
| H  | 1.5758318392  | -0.6492182632 | 5.7521304107  |
| Fe | 0.0049112317  | 0.1542539873  | -0.4388669808 |
| C  | -3.3903161248 | -0.4989645372 | -0.3991561766 |
| C  | -0.6833570639 | 3.4879632012  | -0.1194490713 |
| C  | 3.3799427938  | 0.8522833846  | -0.471560272  |
| C  | 0.6430876805  | -3.1548267593 | -0.7510056356 |
| N  | -1.6939060915 | 1.2678013851  | -0.2347494395 |
| C  | -2.9906257137 | 0.8280502718  | -0.3795436203 |
| C  | -3.9108717466 | 1.9371448649  | -0.4865316378 |
| C  | -3.151512656  | 3.0859373687  | -0.3827812574 |
| C  | -1.7764440837 | 2.64181624    | -0.2375868866 |
| C  | -3.6009963362 | 4.5332324035  | -0.3873523143 |
| C  | -5.4119730826 | 1.8474115729  | -0.5796091478 |
| N  | 1.123538615   | 1.8121259126  | -0.2057772211 |
| C  | 0.6471804839  | 3.0986276162  | -0.1020046927 |
| C  | 1.7339103083  | 4.0552332368  | -0.0422169616 |
| C  | 2.8894830645  | 3.3223985758  | -0.1470908069 |
| C  | 2.4962304961  | 1.9186550924  | -0.2695144857 |
| C  | 1.5476356543  | 5.5457368159  | 0.1417719067  |
| C  | 4.2830482948  | 3.8674723874  | -0.0880567121 |
| N  | 1.7221415039  | -0.9492582626 | -0.5239436414 |
| C  | 3.0262055436  | -0.4917714026 | -0.625619992  |
| C  | 3.945820408   | -1.6086309957 | -0.9036021464 |
| C  | 3.1429996818  | -2.7289200618 | -0.9494796206 |
| C  | 1.7610620004  | -2.3074907372 | -0.7339819162 |
| C  | 5.4839203791  | -1.5721042207 | -1.0784311675 |
| C  | 3.6325156844  | -4.1184838812 | -1.2518534294 |
| N  | -1.1589644386 | -1.509502538  | -0.449067873  |
| C  | -0.7049173106 | -2.7935556278 | -0.6187677534 |
| C  | -1.8413279894 | -3.7143100317 | -0.6707484242 |
| C  | -2.9881509778 | -2.9687565919 | -0.5184885326 |
| C  | -2.5348018016 | -1.589899841  | -0.4170716543 |
| C  | -1.7578934421 | -5.2004827227 | -0.8234389615 |
| C  | -4.4425339658 | -3.4368196318 | -0.5600803468 |
| H  | -4.464046781  | -0.6872965001 | -0.4571832397 |
| H  | -0.8739918725 | 4.5618061099  | -0.0834422007 |
| H  | 4.4428857198  | 1.099658838   | -0.5460193419 |
| H  | 0.8409779304  | -4.2175590042 | -0.9161187243 |
| H  | -2.7294118715 | 5.1823377223  | -0.3036038454 |
| H  | -4.1320644836 | 4.7560822425  | -1.3124828846 |
| H  | -4.2637078118 | 4.7024147244  | 0.4610319396  |
| H  | -5.8093447097 | 1.5127574752  | 0.3787688699  |
| H  | -5.7323372016 | 2.8549126976  | -0.8443775657 |

|   |               |               |               |
|---|---------------|---------------|---------------|
| H | 2.5200274769  | 6.0284512599  | 0.2361483279  |
| H | 1.0103106226  | 5.9740077747  | -0.7048920149 |
| H | 0.9723664381  | 5.7038407994  | 1.0544999381  |
| H | 4.2149728015  | 4.9386691891  | 0.1002094273  |
| H | 5.8916728492  | -2.5691272422 | -1.2455359781 |
| H | 5.7558766835  | -0.9244945951 | -1.9114104838 |
| H | 5.8897253189  | -1.1639189927 | -0.1523662829 |
| H | 4.5257653554  | -4.2914790683 | -0.6521104091 |
| H | -2.7624432938 | -5.6219892233 | -0.7792930061 |
| H | -1.2860238576 | -5.4840919242 | -1.7639690866 |
| H | -1.1669015247 | -5.5820968604 | 0.0086645197  |
| H | -5.1173613174 | -2.5814274453 | -0.5242299236 |
| H | -4.5623921087 | -4.0302502677 | -1.4669210748 |
| O | -0.0407272249 | 0.304186238   | -2.0850143381 |
| H | -5.8249157534 | 1.2316715362  | -1.3790918292 |
| H | 4.8170638732  | 3.3877570936  | 0.7325202794  |
| H | 4.8204917941  | 3.6967218307  | -1.0208416458 |
| H | 3.8967319419  | -4.1268197414 | -2.3095316805 |
| H | 2.900300782   | -4.879544885  | -0.9793603375 |
| H | -4.6957517738 | -4.132191538  | 0.2407021791  |

**Table S2.** Cartesian coordinates of model **1B**:  $\text{Fe}^{\text{IV}}(\text{Por})^{2-}(\text{His})^0(\text{O})^{2-}$  with twisted His

|    |               |               |               |
|----|---------------|---------------|---------------|
| C  | 1.0059512525  | -1.4204213067 | 5.3076174758  |
| C  | 0.4222564286  | -1.028706359  | 3.9874350065  |
| N  | -0.7490837237 | -1.5671250942 | 3.499377107   |
| C  | 0.8694081276  | -0.1743536476 | 3.0343815962  |
| C  | -0.9735278737 | -1.0198597851 | 2.2716283294  |
| N  | -0.0016322933 | -0.1876292812 | 1.9354234683  |
| H  | 0.2044793601  | -1.698814778  | 5.9913139587  |
| H  | 1.672602856   | -2.2671702025 | 5.1429847112  |
| H  | -1.3549931726 | -2.2236750182 | 3.9844516647  |
| H  | 1.7700877232  | 0.4350753285  | 3.0277495331  |
| H  | -1.845861001  | -1.2652310053 | 1.675571225   |
| H  | 1.5910657289  | -0.6110188759 | 5.7449477336  |
| Fe | -0.0018368872 | 0.1851691006  | -0.5810321971 |
| C  | -3.3832481619 | -0.5772190429 | -0.5288986039 |
| C  | -0.7804755635 | 3.4716866974  | -0.1727365191 |
| C  | 3.3526028371  | 0.9478380808  | -0.5256023029 |
| C  | 0.72306951    | -3.1280706628 | -0.8134412666 |
| N  | -1.7240470488 | 1.2283005609  | -0.3601020729 |
| C  | -3.0105969319 | 0.7561171974  | -0.4825772511 |
| C  | -3.9657286857 | 1.838460419   | -0.5188899908 |
| C  | -3.2374050366 | 3.003902726   | -0.405780727  |
| C  | -1.8468839998 | 2.5960394438  | -0.3079791653 |
| C  | -3.723941873  | 4.4360862542  | -0.3892202619 |
| C  | -5.4633185974 | 1.7034015388  | -0.5821862084 |
| N  | 1.0692324138  | 1.8491840551  | -0.2888181596 |
| C  | 0.5595983868  | 3.1206844738  | -0.1583871802 |
| C  | 1.6211987161  | 4.1014575614  | -0.0622337591 |
| C  | 2.7962185064  | 3.3996675312  | -0.1680378168 |
| C  | 2.4405441923  | 1.9903203617  | -0.3281211113 |
| C  | 1.3963491334  | 5.5841544909  | 0.1381395148  |
| C  | 4.1750963127  | 3.9789751285  | -0.0938913618 |
| N  | 1.7357997911  | -0.8869036771 | -0.6104729735 |

|   |               |               |               |
|---|---------------|---------------|---------------|
| C | 3.031191854   | -0.4033599421 | -0.6852488998 |
| C | 3.9825561007  | -1.5014022502 | -0.928469153  |
| C | 3.2092711248  | -2.6410212186 | -0.9727420338 |
| C | 1.8135743629  | -2.2478470753 | -0.7938125357 |
| C | 5.5189924284  | -1.4263727724 | -1.0879166633 |
| C | 3.7355216947  | -4.0207452434 | -1.2619500614 |
| N | -1.1262674503 | -1.5228324877 | -0.6077134809 |
| C | -0.6361754039 | -2.8026917807 | -0.7141183966 |
| C | -1.7437722972 | -3.7579295781 | -0.7070071702 |
| C | -2.9126555    | -3.0407455221 | -0.5696004952 |
| C | -2.5020550829 | -1.646693526  | -0.5595857795 |
| C | -1.6241733319 | -5.2452149393 | -0.8317010808 |
| C | -4.3544097303 | -3.5533423039 | -0.5661145707 |
| H | -4.4534258569 | -0.7897014743 | -0.5606447321 |
| H | -1.0035175892 | 4.5373487159  | -0.1010709578 |
| H | 4.4112131182  | 1.2188524291  | -0.5752190475 |
| H | 0.9560858718  | -4.1890355889 | -0.9384625587 |
| H | -2.8697960069 | 5.107976418   | -0.3054978205 |
| H | -4.2611544916 | 4.6453246657  | -1.3139817931 |
| H | -4.3904985869 | 4.5872025519  | 0.4595618136  |
| H | -5.851247152  | 1.3578163376  | 0.3761813125  |
| H | -5.8103494744 | 2.7022220756  | -0.8462337527 |
| H | 2.3556741042  | 6.0923731047  | 0.2323490735  |
| H | 0.8474840536  | 5.9985327251  | -0.7080352918 |
| H | 0.8175273845  | 5.7264737934  | 1.051219248   |
| H | 4.0787934531  | 5.0478906287  | 0.0950171155  |
| H | 5.9529009283  | -2.412165679  | -1.2557760066 |
| H | 5.7733289181  | -0.7713297066 | -1.9206498331 |
| H | 5.9142914273  | -1.0081116238 | -0.1618036503 |
| H | 4.6333171792  | -4.170382722  | -0.6627123014 |
| H | -2.6171993076 | -5.6931751985 | -0.787338734  |
| H | -1.1454076991 | -5.5157155561 | -1.7726074975 |
| H | -1.0229013548 | -5.6115247292 | -0.000084494  |
| H | -5.0516142758 | -2.716123146  | -0.5294689219 |
| H | -4.4589521531 | -4.1492296236 | -1.4732392501 |
| O | -0.0210415896 | 0.3384575031  | -2.2220778661 |
| H | -5.8602022666 | 1.077398724   | -1.3818322733 |
| H | 4.7220018557  | 3.5130975892  | 0.7261686637  |
| H | 4.7164307434  | 3.8230241544  | -1.0270180026 |
| H | 3.9993690119  | -4.0214972291 | -2.3197529862 |
| H | 3.0238258853  | -4.8010636564 | -0.9895583412 |
| H | -4.5887658104 | -4.2556171892 | 0.2343860309  |

**Table S3.** Cartesian coordinates of model **2A**:  $\text{Fe}^{\text{IV}}(\text{Por})^{2-}(\text{His})^0(\text{OH})^{1-}$

|   |               |               |              |
|---|---------------|---------------|--------------|
| C | 1.533529      | -0.556007     | 5.278315     |
| C | 0.8165978811  | -0.4515489376 | 3.9391045097 |
| N | -0.5665495937 | -0.3031151853 | 3.8728108196 |
| C | 1.2228939511  | -0.3338934702 | 2.6182711948 |
| C | -0.9423995919 | -0.113012733  | 2.5813618603 |
| N | 0.1245828234  | -0.1233802233 | 1.7852113863 |
| H | 0.994082      | -1.202694     | 5.969758     |
| H | 2.555073      | -0.913232     | 5.146597     |
| H | -1.2026665152 | -0.3337243985 | 4.6671489241 |
| H | 2.2302555843  | -0.3793892415 | 2.2142297554 |



|    |               |               |               |
|----|---------------|---------------|---------------|
| H  | -1.9718920469 | 0.0145607047  | 2.261199767   |
| H  | 1.579777      | 0.453708      | 5.687076      |
| Fe | -0.0438365304 | 0.0450975961  | -0.4004994897 |
| C  | -2.4822304287 | -2.4011216804 | -0.4287836308 |
| C  | -2.4877917381 | 2.432720137   | -0.2920679243 |
| C  | 2.3634390095  | 2.5295900051  | -0.5439374962 |
| C  | 2.3557793544  | -2.3427795207 | -0.6885000199 |
| N  | -2.0586279203 | 0.0205788855  | -0.3309393394 |
| C  | -2.8932803422 | -1.0811944523 | -0.4675152851 |
| C  | -4.2694741911 | -0.6806070949 | -0.6343075564 |
| C  | -4.2888285931 | 0.7085487311  | -0.5731391969 |
| C  | -2.9121115189 | 1.1195080141  | -0.3927895606 |
| C  | -5.481983     | 1.648299      | -0.641833     |
| C  | -5.467612     | -1.595257     | -0.738618     |
| N  | -0.0472370077 | 2.0521161907  | -0.2704807847 |
| C  | -1.1684080664 | 2.8560860231  | -0.2450780342 |
| C  | -0.8089845268 | 4.2578284237  | -0.253913605  |
| C  | 0.5639688261  | 4.2988799488  | -0.3304672707 |
| C  | 1.0331925606  | 2.9151997271  | -0.36508652   |
| C  | -1.803068     | 5.394151      | -0.144114     |
| C  | 1.406897      | 5.537281      | -0.309983     |
| N  | 1.992870399   | 0.0986491916  | -0.5439651089 |
| C  | 2.8286562615  | 1.2158628458  | -0.6626122338 |
| C  | 4.2115628032  | 0.8018962663  | -0.9185465783 |
| C  | 4.1786291692  | -0.5887973616 | -0.9276495848 |
| C  | 2.804121181   | -1.0141954238 | -0.7102126653 |
| C  | 5.475931      | 1.68647       | -1.101277     |
| C  | 5.378156      | -1.463985     | -1.184337     |
| N  | -0.0652853162 | -1.9784632197 | -0.4013556059 |
| C  | 1.037767596   | -2.7920698075 | -0.5528855502 |
| C  | 0.613048175   | -4.189186893  | -0.6066001742 |
| C  | -0.7607604532 | -4.2139930421 | -0.4818997252 |
| C  | -1.1617415373 | -2.8205849642 | -0.3952428284 |
| C  | 1.517912      | -5.37504      | -0.722894     |
| C  | -1.698726     | -5.418059     | -0.526556     |
| H  | -3.2615376502 | -3.1613443744 | -0.4931251917 |
| H  | -3.2474218536 | 3.2145138966  | -0.3100927602 |
| H  | 3.1016420501  | 3.3300696235  | -0.6378379481 |
| H  | 3.1155972745  | -3.1153182563 | -0.8281800027 |
| H  | -5.127335     | 2.677133      | -0.580708     |
| H  | -6.02673      | 1.506914      | -1.575012     |
| H  | -6.143203     | 1.440642      | 0.199138      |
| H  | -5.628758     | -2.067067     | 0.230822      |
| H  | -6.292748     | -0.950221     | -1.040072     |
| H  | -1.271824     | 6.342402      | -0.066228     |
| H  | -2.470016     | 5.421363      | -1.006328     |
| H  | -2.387106     | 5.228364      | 0.761656      |
| H  | 0.745041      | 6.390048      | -0.160732     |
| H  | 6.376652      | 1.086525      | -1.231696     |
| H  | 5.354927      | 2.350184      | -1.956879     |
| H  | 5.562681      | 2.279129      | -0.190168     |
| H  | 6.20141       | -1.087408     | -0.577742     |
| H  | 0.92275       | -6.286699     | -0.664602     |
| H  | 2.087492      | -5.371924     | -1.652012     |
| H  | 2.20336       | -5.333953     | 0.123138      |
| H  | -2.738035     | -5.089132     | -0.522464     |
| H  | -1.445333     | -6.002594     | -1.411427     |

|   |               |              |               |
|---|---------------|--------------|---------------|
| O | -0.1683143273 | 0.1010026051 | -2.1945620502 |
| H | -5.446403     | -2.359784    | -1.515715     |
| H | 2.100552      | 5.464917     | 0.528023      |
| H | 1.967176      | 5.670768     | -1.235379     |
| H | 5.623882      | -1.353449    | -2.240729     |
| H | 5.194083      | -2.496586    | -0.885246     |
| H | -1.534715     | -6.111671    | 0.298622      |
| H | 0.7372566012  | 0.1835432645 | -2.5641065109 |

**Table S4.** Cartesian coordinates of model **2B**:  $\text{Fe}^{\text{IV}}(\text{Por})^{2-}(\text{His})^0(\text{OH})^{1-}$  with twisted His

|    |               |               |               |
|----|---------------|---------------|---------------|
| C  | 0.575756      | -1.675977     | 5.258536      |
| C  | 0.12433       | -1.130059     | 3.941262      |
| N  | -1.154291     | -1.307612     | 3.457801      |
| C  | 0.794699      | -0.438478     | 2.987063      |
| C  | -1.2328435387 | -0.7385373784 | 2.2340428586  |
| N  | -0.0596361447 | -0.2267930856 | 1.8763483225  |
| H  | -0.269257     | -1.71343      | 5.94545       |
| H  | 0.969908      | -2.678389     | 5.09023       |
| H  | -1.9247825222 | -1.741268076  | 3.9616448483  |
| H  | 1.8319269213  | -0.1163843704 | 2.9669073092  |
| H  | -2.1532669105 | -0.7180308275 | 1.6641782242  |
| H  | 1.370731      | -1.070108     | 5.694066      |
| Fe | 0.0503750964  | 0.1465862236  | -0.4228821699 |
| C  | -3.4154375289 | 0.4008664423  | -0.4952536772 |
| C  | 0.2487044581  | 3.5289075087  | -0.1234863289 |
| C  | 3.4930423652  | -0.0801857583 | -0.5084986258 |
| C  | -0.21100502   | -3.2241842472 | -0.8139155526 |
| N  | -1.3041074682 | 1.6427560433  | -0.2753840757 |
| C  | -2.6731856128 | 1.5666850686  | -0.434173342  |
| C  | -3.2701804988 | 2.8799182625  | -0.5157393041 |
| C  | -2.2309257621 | 3.791042159   | -0.4046364632 |
| C  | -1.0248475534 | 3.0010947478  | -0.2556711272 |
| C  | -2.290987     | 5.305986      | -0.412311     |
| C  | -4.743878     | 3.1898        | -0.600237     |
| N  | 1.5544084494  | 1.4259650547  | -0.2069407181 |
| C  | 1.4303394619  | 2.8065157991  | -0.1101095013 |
| C  | 2.7253566512  | 3.4423653229  | -0.0779025676 |
| C  | 3.6549588799  | 2.4286177732  | -0.1906814905 |
| C  | 2.9161221738  | 1.1747979745  | -0.2921940487 |
| C  | 2.945112      | 4.931011      | 0.093863      |
| C  | 5.143504      | 2.594638      | -0.151712     |
| N  | 1.4059122189  | -1.3678852883 | -0.5690066452 |
| C  | 2.7953554729  | -1.279659379  | -0.6720456696 |
| C  | 3.3794202718  | -2.5932393324 | -0.9696654505 |
| C  | 2.3035651673  | -3.4661616093 | -1.0169416644 |
| C  | 1.0858107848  | -2.6981150751 | -0.791155395  |
| C  | 4.871258      | -2.966669     | -1.156541     |
| C  | 2.416012      | -4.937745     | -1.325216     |
| N  | -1.5146774162 | -1.1496546669 | -0.5601255707 |
| C  | -1.4151304799 | -2.520265725  | -0.7005761414 |
| C  | -2.7493032955 | -3.1123591294 | -0.729803088  |
| C  | -3.6671787355 | -2.0866277706 | -0.5863854897 |
| C  | -2.8759204608 | -0.8733715081 | -0.5340633722 |
| C  | -3.067619     | -4.569093     | -0.872821     |

|   |               |               |               |
|---|---------------|---------------|---------------|
| C | -5.194475     | -2.163724     | -0.593821     |
| H | -4.4994037637 | 0.5059775008  | -0.5514895361 |
| H | 0.3461574157  | 4.6139426713  | -0.0794167756 |
| H | 4.5822390458  | -0.1182833524 | -0.5900452264 |
| H | -0.2960837743 | -4.3024494562 | -0.9678726651 |
| H | -1.279309     | 5.703499      | -0.33168      |
| H | -2.748865     | 5.662928      | -1.334537     |
| H | -2.882556     | 5.640702      | 0.439497      |
| H | -5.211107     | 2.968415      | 0.359488      |
| H | -4.78984      | 4.246794      | -0.861855     |
| H | 4.010463      | 5.141488      | 0.184373      |
| H | 2.53541       | 5.487602      | -0.749538     |
| H | 2.435286      | 5.23192       | 1.009579      |
| H | 5.359597      | 3.64565       | 0.038597      |
| H | 5.002489      | -4.035265     | -1.327191     |
| H | 5.300084      | -2.410742     | -1.989768     |
| H | 5.373797      | -2.681819     | -0.231769     |
| H | 3.235102      | -5.34067      | -0.730021     |
| H | -4.147366     | -4.712458     | -0.824559     |
| H | -2.690609     | -4.963911     | -1.816046     |
| H | -2.593952     | -5.094697     | -0.044161     |
| H | -5.621128     | -1.161374     | -0.553377     |
| H | -5.469598     | -2.702392     | -1.501032     |
| O | 0.046762209   | 0.3488717209  | -2.2063307119 |
| H | -5.307222     | 2.706182      | -1.398728     |
| H | 5.536408      | 1.989346      | 0.665536      |
| H | 5.613428      | 2.291504      | -1.087324     |
| H | 2.664362      | -5.012132     | -2.384155     |
| H | 1.510944      | -5.480849     | -1.050454     |
| H | -5.617883     | -2.770566     | 0.207042      |
| H | 0.9671443454  | 0.2512831082  | -2.5329263154 |

**Table S5.** Cartesian coordinates of model **3A**:  $\text{Fe}^{\text{IV}}(\text{Por})^{2-}(\text{His})^0(\text{O}^{\cdots}\text{HB})^{2-}$

|    |               |               |               |
|----|---------------|---------------|---------------|
| C  | 4.6467444549  | -2.3139949355 | 4.1871423285  |
| C  | 3.6998253758  | -1.4561690903 | 3.3700956126  |
| N  | 3.4594243173  | -0.1262491666 | 3.7064657079  |
| C  | 3.034052734   | -1.6175738225 | 2.1661305165  |
| C  | 2.6847228838  | 0.4409673691  | 2.7367530897  |
| N  | 2.4093671992  | -0.437320982  | 1.7834854499  |
| H  | 4.5098526067  | -2.1434874333 | 5.2546107419  |
| H  | 4.5174978927  | -3.3711530279 | 3.9542816537  |
| H  | 3.7956016074  | 0.3438824183  | 4.5434288333  |
| H  | 2.964768327   | -2.5076800832 | 1.5457069844  |
| H  | 2.3374897766  | 1.4703274843  | 2.7650139032  |
| H  | 5.6589498165  | -2.0272493838 | 3.9008447657  |
| Fe | 0.9652858093  | 0.0571025214  | 0.0001876037  |
| C  | -1.2796002293 | 1.3775280666  | 2.2641081208  |
| C  | 2.315647476   | 3.1790383057  | -0.4098907001 |
| C  | 3.2490534406  | -1.2127018542 | -2.2597828824 |
| C  | -0.3436453578 | -3.0230151755 | 0.469031508   |
| N  | 0.6305911985  | 1.8991766635  | 0.8121255936  |
| C  | -0.4258552822 | 2.2593257121  | 1.61846861    |
| C  | -0.5273551321 | 3.6956673217  | 1.7346546279  |
| C  | 0.5152675582  | 4.2235203787  | 0.9976828524  |

|   |               |               |               |
|---|---------------|---------------|---------------|
| C | 1.2109917507  | 3.0863332806  | 0.4235925007  |
| C | 0.9160492985  | 5.6728023143  | 0.8081612187  |
| C | -1.5101959676 | 4.4557470781  | 2.5864591298  |
| N | 2.5321546778  | 0.8036725656  | -1.0339086442 |
| C | 2.9235930731  | 2.1231637822  | -1.0704731366 |
| C | 4.0489500563  | 2.3121377929  | -1.9634715986 |
| C | 4.319589784   | 1.0769442669  | -2.498224734  |
| C | 3.3526997505  | 0.1414961073  | -1.9231877369 |
| C | 4.7539342764  | 3.63462393    | -2.1801521468 |
| C | 5.4323992392  | 0.7572236376  | -3.4498481151 |
| N | 1.4230053617  | -1.7942739934 | -0.7339432973 |
| C | 2.3253424076  | -2.1211692189 | -1.7351794731 |
| C | 2.1687452655  | -3.5307217643 | -2.133135982  |
| C | 1.1561268311  | -4.0175072867 | -1.3326834521 |
| C | 0.6919652663  | -2.9298330494 | -0.4737245308 |
| C | 2.9729382408  | -4.331452721  | -3.1884030643 |
| C | 0.5997166585  | -5.412171397  | -1.4159216216 |
| N | -0.4469103638 | -0.689203226  | 1.2433856282  |
| C | -0.8766764891 | -1.9944345224 | 1.2601396467  |
| C | -2.0189676901 | -2.1259613071 | 2.1688201883  |
| C | -2.2552132414 | -0.8853482754 | 2.7174128171  |
| C | -1.2828797334 | 0.0009510047  | 2.0976131497  |
| C | -2.7736733912 | -3.3844467332 | 2.4466349489  |
| C | -3.3607114469 | -0.4670578971 | 3.6841278581  |
| H | -2.0340665647 | 1.8154470738  | 2.9205089859  |
| H | 2.7252096689  | 4.171770197   | -0.6025229068 |
| H | 3.9394073668  | -1.5869442613 | -3.0211639491 |
| H | -0.8223278573 | -4.0005479164 | 0.5725099109  |
| H | 1.7817210255  | 5.7249650955  | 0.1479320877  |
| H | 0.0905347468  | 6.2327361084  | 0.3693424964  |
| H | 1.1707958581  | 6.1018107623  | 1.7769857342  |
| H | -1.2584206044 | 4.3106076761  | 3.6371397285  |
| H | -1.410851271  | 5.4922424732  | 2.2645865972  |
| H | 5.6092244888  | 3.4922277417  | -2.8402036433 |
| H | 4.0715967117  | 4.3615514179  | -2.6217015497 |
| H | 5.0977480269  | 4.0005830467  | -1.2122316801 |
| H | 6.0109788052  | 1.6673057738  | -3.6064916313 |
| H | 2.6417908474  | -5.3686477851 | -3.2414012031 |
| H | 2.8752393416  | -3.8686938039 | -4.169994685  |
| H | 4.0160483982  | -4.2985833354 | -2.8726028062 |
| H | 1.4436712232  | -6.1007667095 | -1.4489547612 |
| H | -3.5273171517 | -3.1859392893 | 3.2090999494  |
| H | -3.2544158747 | -3.7952673222 | 1.5590510891  |
| H | -2.0480972417 | -4.100843062  | 2.8308387375  |
| H | -3.3388521766 | 0.611161953   | 3.8433042612  |
| H | -4.308583735  | -0.8127324841 | 3.2706871666  |
| O | -0.1542882519 | 0.3341429665  | -1.1973314016 |
| H | -2.5686420372 | 4.2431233722  | 2.4337729241  |
| H | 6.0717307774  | -0.0082666666 | -3.009478068  |
| H | 5.0472145759  | 0.4033614062  | -4.4061447722 |
| H | 0.045810287   | -5.4697225909 | -2.3531721707 |
| H | 0.0017027855  | -5.6658378103 | -0.5397722288 |
| H | -3.2954674666 | -0.9769008219 | 4.645750141   |
| N | -4.9360952513 | 2.0881911205  | -3.6525907086 |
| C | -3.941807631  | 1.6497276208  | -2.6944169835 |
| C | -4.2234233484 | 0.1941862061  | -2.3106476104 |
| O | -5.2353205788 | -0.399470944  | -2.6856820382 |

|   |               |               |               |
|---|---------------|---------------|---------------|
| C | -3.8590706865 | 2.6179357438  | -1.5149757477 |
| O | -5.0723249673 | 2.6463573741  | -0.7872668355 |
| H | -5.8567955848 | 1.8361444009  | -3.3216521235 |
| H | -2.9678404479 | 1.6236532381  | -3.1827826792 |
| H | -3.0458130911 | 2.317505276   | -0.8540494149 |
| H | -3.6725890114 | 3.6182568627  | -1.9067451237 |
| H | -4.9668008481 | 3.2793020398  | 0.0434393162  |
| N | -3.294742946  | -0.3857030168 | -1.5058540625 |
| C | -3.5657063648 | -1.7191370183 | -1.0186822548 |
| C | -4.7231462731 | -1.8011575637 | -0.0437137995 |
| O | -5.10992843   | -2.8901643526 | 0.3761192349  |
| H | -2.3615149377 | 0.0184302451  | -1.3631816137 |
| H | -3.7357692988 | -2.4109074421 | -1.8442628259 |
| H | -2.6668146014 | -1.9895660379 | -0.46436128   |
| N | -5.2626288251 | -0.6458456061 | 0.3259101401  |
| H | -4.8733103444 | 0.2131703226  | -0.0345531103 |
| H | -6.0505352642 | -0.6263816107 | 0.9577286236  |
| H | -4.7651869456 | 1.6426530864  | -4.542810463  |

**Table S6.** Cartesian coordinates of model **3B**:  $\text{Fe}^{\text{IV}}(\text{Por})^{2-}(\text{His})^0(\text{O}^{\cdot\cdot}\text{HB})^{2-}$  with twisted His

|    |               |               |               |
|----|---------------|---------------|---------------|
| C  | 4.6435191289  | -2.496052237  | 4.083895294   |
| C  | 3.6121955792  | -1.6912314745 | 3.3588730351  |
| N  | 2.3426839589  | -1.4837139366 | 3.8542614861  |
| C  | 3.6521419917  | -1.0703556977 | 2.1542604194  |
| C  | 1.6611833345  | -0.737744767  | 2.9412265217  |
| N  | 2.4073830992  | -0.4852564021 | 1.8772992582  |
| H  | 4.4818489587  | -2.4112307862 | 5.1581248214  |
| H  | 4.5431975692  | -3.53466205   | 3.7680832597  |
| H  | 1.9938521641  | -1.7928166687 | 4.7578410601  |
| H  | 4.4689097622  | -1.0156543858 | 1.438443972   |
| H  | 0.6407123524  | -0.4115369613 | 3.1080495848  |
| H  | 5.6542818456  | -2.1664991458 | 3.8420224128  |
| Fe | 0.9136574148  | 0.1568483978  | -0.0991545753 |
| C  | -1.4109284721 | 1.2334511816  | 2.2236220087  |
| C  | 2.2466976976  | 3.2924214919  | -0.1633793746 |
| C  | 3.3186341767  | -0.9196304851 | -2.327212807  |
| C  | -0.2802864803 | -3.0107381444 | 0.178894961   |
| N  | 0.5241881347  | 1.8947003176  | 0.8592124918  |
| C  | -0.5423841938 | 2.1692041331  | 1.68424276    |
| C  | -0.6361926657 | 3.581736403   | 1.965184808   |
| C  | 0.4131309742  | 4.1831121864  | 1.3014532913  |
| C  | 1.1179362636  | 3.1121410489  | 0.6206935677  |
| C  | 0.7971481637  | 5.6455199648  | 1.2475662439  |
| C  | -1.6348643624 | 4.2434489505  | 2.8753699617  |
| N  | 2.5143707497  | 0.9855456497  | -0.9839748223 |
| C  | 2.8915584729  | 2.3070652717  | -0.8922473662 |
| C  | 4.0512993564  | 2.5799808364  | -1.7163369941 |
| C  | 4.3605981904  | 1.3958153619  | -2.3394175375 |
| C  | 3.3825318351  | 0.4067505371  | -1.8875948498 |
| C  | 4.7387031646  | 3.926191113   | -1.8055635395 |
| C  | 5.5078894442  | 1.1703106972  | -3.2770765707 |
| N  | 1.4553432363  | -1.6387100944 | -0.9116941763 |
| C  | 2.401474451   | -1.8813578695 | -1.895280851  |
| C  | 2.3090192489  | -3.2709653028 | -2.3753938056 |

|   |               |               |               |
|---|---------------|---------------|---------------|
| C | 1.2951578252  | -3.8386586469 | -1.6342613331 |
| C | 0.7676233639  | -2.8167186779 | -0.7318527285 |
| C | 3.1614066941  | -3.9748865718 | -3.4584402024 |
| C | 0.7793735087  | -5.2394738409 | -1.8248671423 |
| N | -0.5271094398 | -0.7200757677 | 1.0407966653  |
| C | -0.8788735224 | -2.0509208849 | 1.007100456   |
| C | -1.9970498383 | -2.2905706155 | 1.9218977931  |
| C | -2.2868246497 | -1.0951470284 | 2.5444472434  |
| C | -1.3898774288 | -0.1238246928 | 1.943683541   |
| C | -2.7147923836 | -3.5879460962 | 2.1088374507  |
| C | -3.3928816072 | -0.7877671275 | 3.553258701   |
| H | -2.169738935  | 1.6044134599  | 2.9153100616  |
| H | 2.656544452   | 4.3003753197  | -0.2412896105 |
| H | 4.0462726528  | -1.2265250931 | -3.0838812032 |
| H | -0.7048947224 | -4.0168330463 | 0.2288624656  |
| H | 1.6741653908  | 5.7669004704  | 0.6118630457  |
| H | -0.0322611992 | 6.2197782579  | 0.8354139401  |
| H | 1.02292848    | 6.0039990137  | 2.251598624   |
| H | -1.4004595126 | 4.0232497701  | 3.9169805835  |
| H | -1.5530839021 | 5.3035434724  | 2.635984162   |
| H | 5.609812705   | 3.8533992209  | -2.4562059214 |
| H | 4.0486200686  | 4.6701851813  | -2.2046025689 |
| H | 5.0549771348  | 4.2237995902  | -0.8053615749 |
| H | 6.0683537808  | 2.1019345638  | -3.3512230368 |
| H | 2.8552924392  | -5.0117727079 | -3.5977319957 |
| H | 3.072352408   | -3.4401054155 | -4.4035811702 |
| H | 4.197095861   | -3.944104761  | -3.1188972307 |
| H | 1.6394199153  | -5.9052483488 | -1.8925316307 |
| H | -3.4875989469 | -3.4649328964 | 2.8680309494  |
| H | -3.16847581   | -3.9393917945 | 1.1823660427  |
| H | -1.9806086227 | -4.3161003909 | 2.452439733   |
| H | -3.3989383766 | 0.2752119799  | 3.7949438942  |
| H | -4.3242718869 | -1.1207940817 | 3.0944655073  |
| O | -0.1602692629 | 0.4983402042  | -1.3141809693 |
| H | -2.6849470483 | 4.0205977049  | 2.6843367836  |
| H | 6.1558957471  | 0.3870470576  | -2.8830817708 |
| H | 5.1497575433  | 0.8829792499  | -4.2656468418 |
| H | 0.2454119477  | -5.2365224121 | -2.7753614035 |
| H | 0.170292412   | -5.5726099177 | -0.9836504212 |
| H | -3.334793673  | -1.3686387545 | 4.4741973227  |
| N | -4.8824960606 | 2.2905906025  | -3.5981980364 |
| C | -3.8973617943 | 1.8010311424  | -2.6554377208 |
| C | -4.1554685543 | 0.3147952321  | -2.3895176899 |
| O | -5.1491921521 | -0.2674328936 | -2.8260268861 |
| C | -3.8600356895 | 2.6770806525  | -1.4038395354 |
| O | -5.0876518564 | 2.6233863612  | -0.7021063454 |
| H | -5.8034680884 | 1.9941469629  | -3.307219184  |
| H | -2.913668322  | 1.8335082858  | -3.1235033013 |
| H | -3.0531962661 | 2.3441276502  | -0.7506761231 |
| H | -3.6889565396 | 3.7083656622  | -1.7138139747 |
| H | -5.0130070565 | 3.1925903363  | 0.1766780358  |
| N | -3.2288499154 | -0.3053462098 | -1.6126616844 |
| C | -3.4768302933 | -1.6780524201 | -1.2349030252 |
| C | -4.6509646849 | -1.8596823962 | -0.2939582966 |
| O | -5.0207641872 | -2.9858200098 | 0.0329337398  |
| H | -2.3021701024 | 0.1026077617  | -1.4369684488 |
| H | -3.6147326068 | -2.3076707571 | -2.1144567198 |

|   |               |               |               |
|---|---------------|---------------|---------------|
| H | -2.5829961256 | -1.971056119  | -0.6838864074 |
| N | -5.224003823  | -0.7480862484 | 0.1514506731  |
| H | -4.847545644  | 0.1442785309  | -0.1338129596 |
| H | -6.0243810128 | -0.7942158379 | 0.7659735896  |
| H | -4.6839763514 | 1.9186967199  | -4.5160705031 |

**Table S7.** Cartesian coordinates of model **4A**:  $\text{Fe}^{\text{IV}}(\text{Por})^{2-}(\text{His}\cdots\text{H}_2\text{O})^0(\text{O})^{2-}$

|    |               |               |               |
|----|---------------|---------------|---------------|
| C  | 1.533529      | -0.556007     | 5.278315      |
| C  | 0.8105759718  | -0.4684933491 | 3.9479550391  |
| N  | -0.5759040858 | -0.3923899936 | 3.8857756198  |
| C  | 1.2220129624  | -0.3029716269 | 2.634204452   |
| C  | -0.9361617834 | -0.1960757186 | 2.5875270631  |
| N  | 0.1285080162  | -0.1339795667 | 1.7958543626  |
| H  | 0.994082      | -1.202694     | 5.969758      |
| H  | 2.555073      | -0.913232     | 5.146597      |
| H  | -1.2344806814 | -0.4800229134 | 4.6770897493  |
| H  | 2.2336925269  | -0.2905123257 | 2.2356673693  |
| H  | -1.9668679517 | -0.1155351901 | 2.2524089984  |
| H  | 1.579777      | 0.453708      | 5.687076      |
| Fe | -0.0363269135 | 0.0530925707  | -0.5093193129 |
| C  | -2.4812061559 | -2.3934803224 | -0.4682856173 |
| C  | -2.4872654976 | 2.4314523475  | -0.3264302641 |
| C  | 2.3614596534  | 2.5257799666  | -0.5772410949 |
| C  | 2.3536769481  | -2.3324170831 | -0.7137694108 |
| N  | -2.0753618655 | 0.0248965944  | -0.363294168  |
| C  | -2.8966487967 | -1.0713138459 | -0.4961149735 |
| C  | -4.2782264541 | -0.6748013511 | -0.6464399146 |
| C  | -4.2975679936 | 0.7045103253  | -0.5823367103 |
| C  | -2.9140212321 | 1.1141499608  | -0.4159991396 |
| C  | -5.481983     | 1.648299      | -0.641833     |
| C  | -5.467612     | -1.595257     | -0.738618     |
| N  | -0.0493817773 | 2.059859551   | -0.3437852704 |
| C  | -1.1683220643 | 2.8577791621  | -0.2913565185 |
| C  | -0.8080958702 | 4.2614026235  | -0.2710399324 |
| C  | 0.561428601   | 4.3019158998  | -0.3477497571 |
| C  | 1.0273052203  | 2.9165930755  | -0.4132431282 |
| C  | -1.803068     | 5.394151      | -0.144114     |
| C  | 1.406897      | 5.537281      | -0.309983     |
| N  | 2.0049762953  | 0.1036556769  | -0.5620442283 |
| C  | 2.8274441678  | 1.2115530337  | -0.6825365617 |
| C  | 4.220695349   | 0.796824163   | -0.9249333662 |
| C  | 4.1866962181  | -0.5815613962 | -0.9308929733 |
| C  | 2.8028088773  | -1.0033723706 | -0.7258548597 |
| C  | 5.475931      | 1.68647       | -1.101277     |
| C  | 5.378156      | -1.463985     | -1.184337     |
| N  | -0.0667367888 | -1.9775739026 | -0.4695996328 |
| C  | 1.0332008303  | -2.7877983366 | -0.5948709354 |
| C  | 0.611034599   | -4.1891627584 | -0.62118557   |
| C  | -0.7593719047 | -4.2128897794 | -0.4979975203 |
| C  | -1.1606191114 | -2.8153483268 | -0.4416055643 |
| C  | 1.517912      | -5.37504      | -0.722894     |
| C  | -1.698726     | -5.418059     | -0.526556     |
| H  | -3.2615304278 | -3.15485076   | -0.5260177954 |
| H  | -3.2486391999 | 3.2134881785  | -0.3328115883 |

|   |               |               |               |
|---|---------------|---------------|---------------|
| H | 3.1024395353  | 3.3259160344  | -0.663230678  |
| H | 3.1178138727  | -3.1037630304 | -0.8438482215 |
| H | -5.127335     | 2.677133      | -0.580708     |
| H | -6.02673      | 1.506914      | -1.575012     |
| H | -6.143203     | 1.440642      | 0.199138      |
| H | -5.628758     | -2.067067     | 0.230822      |
| H | -6.292748     | -0.950221     | -1.040072     |
| H | -1.271824     | 6.342402      | -0.066228     |
| H | -2.470016     | 5.421363      | -1.006328     |
| H | -2.387106     | 5.228364      | 0.761656      |
| H | 0.745041      | 6.390048      | -0.160732     |
| H | 6.376652      | 1.086525      | -1.231696     |
| H | 5.354927      | 2.350184      | -1.956879     |
| H | 5.562681      | 2.279129      | -0.190168     |
| H | 6.20141       | -1.087408     | -0.577742     |
| H | 0.92275       | -6.286699     | -0.664602     |
| H | 2.087492      | -5.371924     | -1.652012     |
| H | 2.20336       | -5.333953     | 0.123138      |
| H | -2.738035     | -5.089132     | -0.522464     |
| H | -1.445333     | -6.002594     | -1.411427     |
| O | -0.1188545434 | 0.1066242888  | -2.1622596494 |
| H | -5.446403     | -2.359784     | -1.515715     |
| H | 2.100552      | 5.464917      | 0.528023      |
| H | 1.967176      | 5.670768      | -1.235379     |
| H | 5.623882      | -1.353449     | -2.240729     |
| H | 5.194083      | -2.496586     | -0.885246     |
| H | -1.534715     | -6.111671     | 0.298622      |
| O | -2.5660558174 | -0.6295303846 | 5.9515228391  |
| H | -3.1120705022 | 0.156495828   | 6.1307389735  |
| H | -3.1835223321 | -1.3772130147 | 5.8628243672  |

**Table S8.** Cartesian coordinates of model **4B**:  $\text{Fe}^{\text{IV}}(\text{Por})^{2-}(\text{His}\cdots\text{H}_2\text{O})^0(\text{O})^{2-}$  with twisted His

|    |               |               |               |
|----|---------------|---------------|---------------|
| C  | -1.6468201872 | -1.9594391404 | 5.0168727972  |
| C  | -1.3815184223 | -1.2250940377 | 3.7412446603  |
| N  | -2.340565573  | -0.4703071976 | 3.1004468381  |
| C  | -0.2710090333 | -1.1590846885 | 2.966224646   |
| C  | -1.7645821814 | 0.0345886341  | 1.9720004612  |
| N  | -0.5077780469 | -0.3653625606 | 1.8400883389  |
| H  | -2.3986648961 | -1.423228123  | 5.5954650962  |
| H  | -2.0067044308 | -2.9565897813 | 4.7626693538  |
| H  | -3.3034563293 | -0.2795025675 | 3.4200831982  |
| H  | 0.6989669572  | -1.6264979141 | 3.1256259335  |
| H  | -2.300172109  | 0.6841240333  | 1.2859779039  |
| H  | -0.7409631219 | -2.0700183882 | 5.6134659476  |
| Fe | 0.4389361017  | 0.1182283384  | -0.682090596  |
| C  | -1.9009401083 | 2.6605042894  | -0.9342931314 |
| C  | 2.7805376654  | 2.4317414082  | 0.2083755986  |
| C  | 2.757626354   | -2.3961956874 | -0.2905220516 |
| C  | -1.9674681226 | -2.1605277711 | -1.3926828271 |
| N  | 0.4300335015  | 2.1256262407  | -0.3746755007 |
| C  | -0.5899403117 | 3.0063156157  | -0.6558072439 |
| C  | -0.1348929853 | 4.3756836758  | -0.5985249881 |
| C  | 1.2009088417  | 4.3279781284  | -0.2585075066 |
| C  | 1.5263029701  | 2.9180949832  | -0.1266489286 |



|   |               |               |               |
|---|---------------|---------------|---------------|
| C | 2.1750714502  | 5.4686415236  | -0.0518961469 |
| C | -0.9828167175 | 5.6059570436  | -0.786208089  |
| N | 2.3373871627  | 0.020683409   | -0.0411565348 |
| C | 3.1459604638  | 1.0965414706  | 0.2523115328  |
| C | 4.4960781721  | 0.670321983   | 0.5613758247  |
| C | 4.5033944806  | -0.6952020757 | 0.4192965091  |
| C | 3.1526779307  | -1.0914618894 | 0.021613433   |
| C | 5.614153896   | 1.6045712283  | 0.9753717508  |
| C | 5.6735426315  | -1.5976824933 | 0.6686292522  |
| N | 0.4094797258  | -1.9148175237 | -0.7832366917 |
| C | 1.4774246551  | -2.790745089  | -0.6902257988 |
| C | 1.0591617835  | -4.1599319295 | -1.0389507865 |
| C | -0.2875414463 | -4.0621192346 | -1.3127471564 |
| C | -0.6785828537 | -2.6619006373 | -1.1688340023 |
| C | 1.915453843   | -5.4473649688 | -1.0830805027 |
| C | -1.1499730025 | -5.2028915853 | -1.7796361717 |
| N | -1.5640997319 | 0.2363189565  | -1.026755709  |
| C | -2.3871766852 | -0.8257693171 | -1.3180186793 |
| C | -3.7515414244 | -0.3478578258 | -1.5355949183 |
| C | -3.7486126684 | 1.0188846815  | -1.3548578083 |
| C | -2.3637025696 | 1.3621582285  | -1.0804620923 |
| C | -4.9353108719 | -1.1942408277 | -1.890708216  |
| C | -4.9025002249 | 2.0087641932  | -1.5340906795 |
| H | -2.6078508148 | 3.480692283   | -1.073341156  |
| H | 3.565962096   | 3.1567299522  | 0.4272790308  |
| H | 3.5248109848  | -3.1736115603 | -0.2311548112 |
| H | -2.7323117037 | -2.8906610305 | -1.6712604571 |
| H | 3.1579507329  | 5.0652105494  | 0.1914785947  |
| H | 2.2415497161  | 6.0612666787  | -0.9639701163 |
| H | 1.827768474   | 6.0995290584  | 0.7659910405  |
| H | -1.6320611279 | 5.7438929854  | 0.0785307511  |
| H | -0.2617984519 | 6.4138255054  | -0.9099978663 |
| H | 6.5085581424  | 1.0278105669  | 1.2098197057  |
| H | 5.836016727   | 2.308272206   | 0.1725249234  |
| H | 5.2922758739  | 2.1535444446  | 1.8607904577  |
| H | 6.5024714536  | -0.9827390968 | 1.0182518015  |
| H | 1.3218969863  | -6.3130079312 | -1.3773769681 |
| H | 2.7400502753  | -5.3176037733 | -1.7835068628 |
| H | 2.3115315908  | -5.602371212  | -0.0791682395 |
| H | -0.9310942794 | -6.0692890167 | -1.155901897  |
| H | -5.8187074076 | -0.5615776583 | -1.9812770554 |
| H | -4.7675714637 | -1.7203402057 | -2.8302321463 |
| H | -5.0877470191 | -1.9187095092 | -1.0913092978 |
| H | -4.5443226559 | 3.0307269034  | -1.409487076  |
| H | -5.3078885282 | 1.8227941953  | -2.5290605401 |
| O | 0.8429271886  | 0.2817873165  | -2.2697157527 |
| H | -1.5776455631 | 5.6549611294  | -1.6986527963 |
| H | 5.4113376244  | -2.3248758087 | 1.4374027926  |
| H | 5.9685543162  | -2.1205658854 | -0.2410872114 |
| H | -0.840189207  | -5.4049358597 | -2.8052730622 |
| H | -2.2142619365 | -4.9859545115 | -1.6803835592 |
| H | -5.7518274205 | 1.8388587143  | -0.871783158  |
| O | -5.0710341719 | 0.218912933   | 3.7455082575  |
| H | -5.695442885  | -0.0773254667 | 3.0591668248  |
| H | -5.2172088177 | 1.1762899079  | 3.8492128059  |

**Table S9.** Cartesian coordinates of model **5A**:  $\text{Fe}^{\text{IV}}(\text{Por})^{2-}(\text{His}\cdots\text{H}_2\text{O})^0(\text{O}\cdots\text{HB})^{2-}$ 

|    |               |               |               |
|----|---------------|---------------|---------------|
| C  | 4.638732      | -2.308075     | 4.165615      |
| C  | 3.6864552546  | -1.4499445376 | 3.3511988624  |
| N  | 3.4061311982  | -0.1388410649 | 3.7182971811  |
| C  | 3.0481758194  | -1.6064791528 | 2.1296570619  |
| C  | 2.6357926722  | 0.4243408339  | 2.7481066109  |
| N  | 2.3974413788  | -0.4351363429 | 1.7627615704  |
| H  | 4.504074      | -2.135747     | 5.233075      |
| H  | 4.508289      | -3.365517     | 3.934721      |
| H  | 3.7084375587  | 0.3324288379  | 4.5870242255  |
| H  | 3.0148683016  | -2.4843771346 | 1.4889379897  |
| H  | 2.2572413456  | 1.4419780066  | 2.7922058094  |
| H  | 5.650567      | -2.022499     | 3.87685       |
| Fe | 0.9682866346  | 0.0536032572  | 0.0038289564  |
| C  | -1.2816660572 | 1.3824026815  | 2.2563283938  |
| C  | 2.3073966096  | 3.1778857753  | -0.4296762469 |
| C  | 3.2330200278  | -1.217334304  | -2.2749682786 |
| C  | -0.354947075  | -3.0209880305 | 0.4638858473  |
| N  | 0.6283994939  | 1.9023370203  | 0.8046803838  |
| C  | -0.4286590197 | 2.2636809728  | 1.6084346113  |
| C  | -0.533827347  | 3.7007021851  | 1.7164402472  |
| C  | 0.5076691855  | 4.2266330774  | 0.976276006   |
| C  | 1.2057069239  | 3.0875236237  | 0.4085090531  |
| C  | 0.906904      | 5.675856      | 0.781115      |
| C  | -1.516659     | 4.463371      | 2.566179      |
| N  | 2.5248716765  | 0.8006271071  | -1.0469940807 |
| C  | 2.9135514124  | 2.1203086707  | -1.0894851373 |
| C  | 4.0336983354  | 2.3081334994  | -1.9896162583 |
| C  | 4.3026600471  | 1.071963646   | -2.5223434553 |
| C  | 3.3398612012  | 0.1370043888  | -1.9391310911 |
| C  | 4.737443      | 3.630171      | -2.211492     |
| C  | 5.411391      | 0.75025       | -3.477873     |
| N  | 1.4116777103  | -1.796660395  | -0.743503132  |
| C  | 2.309423883   | -2.1243875699 | -1.7476892148 |
| C  | 2.148305302   | -3.5337111371 | -2.1463983332 |
| C  | 1.1370655378  | -4.0183633317 | -1.3433096361 |
| C  | 0.6790102399  | -2.9300697285 | -0.4809916757 |
| C  | 2.948915      | -4.336279     | -3.203329     |
| C  | 0.578459      | -5.412474     | -1.424407     |
| N  | -0.4507864343 | -0.6881336698 | 1.2410563183  |
| C  | -0.8842132756 | -1.991308422  | 1.2563860174  |
| C  | -2.0297178088 | -2.1189431249 | 2.162285501   |
| C  | -2.2631874116 | -0.8777140437 | 2.7098693006  |
| C  | -1.2864121846 | 0.005436078   | 2.0919342551  |
| C  | -2.785862     | -3.376154     | 2.441537      |
| C  | -3.368419     | -0.45636      | 3.67547       |
| H  | -2.0367648894 | 1.8211177559  | 2.9117389597  |
| H  | 2.7142365749  | 4.1704299703  | -0.6298755554 |
| H  | 3.9193510386  | -1.5921657687 | -3.0397139146 |
| H  | -0.8364098401 | -3.99712273   | 0.5673790955  |
| H  | 1.771302      | 5.726347      | 0.119089      |
| H  | 0.080911      | 6.235656      | 0.343026      |
| H  | 1.163868      | 6.106251      | 1.748738      |
| H  | -1.262904     | 4.319753      | 3.616592      |
| H  | -1.417232     | 5.499275      | 2.242434      |

|   |               |               |               |
|---|---------------|---------------|---------------|
| H | 5.591325      | 3.486111      | -2.873004     |
| H | 4.054738      | 4.35686       | -2.652864     |
| H | 5.083428      | 3.997453      | -1.244847     |
| H | 5.990291      | 1.659673      | -3.637134     |
| H | 2.616942      | -5.373326     | -3.253994     |
| H | 2.849593      | -3.875038     | -4.185473     |
| H | 3.992671      | -4.303628     | -2.889649     |
| H | 1.421867      | -6.101711     | -1.457997     |
| H | -3.537855     | -3.175889     | 3.20517       |
| H | -3.268647     | -3.788073     | 1.555572      |
| H | -2.060024     | -4.092436     | 2.825461      |
| H | -3.345494     | 0.6221        | 3.832858      |
| H | -4.317348     | -0.802041     | 3.264466      |
| O | -0.1576457558 | 0.334591523   | -1.1903547757 |
| H | -2.575553     | 4.25124       | 2.415933      |
| H | 6.051061      | -0.014975     | -3.037532     |
| H | 5.024066      | 0.395112      | -4.432832     |
| H | 0.022657      | -5.471153     | -2.360465     |
| H | -0.017994     | -5.664306     | -0.546666     |
| H | -3.301624     | -0.964694     | 4.637784      |
| N | -4.956557     | 2.088129      | -3.662238     |
| C | -3.960678     | 1.65052       | -2.705327     |
| C | -4.2429846783 | 0.1959727299  | -2.3178770175 |
| O | -5.2571933431 | -0.3967378825 | -2.6885698529 |
| C | -3.874932     | 2.620575      | -1.52762      |
| O | -5.086722     | 2.65102       | -0.797557     |
| H | -5.876775     | 1.837261      | -3.32907      |
| H | -2.987699     | 1.622977      | -3.195578     |
| H | -3.060576     | 2.320645      | -0.86782      |
| H | -3.688531     | 3.620131      | -1.921375     |
| H | -4.979112     | 3.285232      | 0.031914      |
| N | -3.3125521005 | -0.3837467993 | -1.5152728734 |
| C | -3.5836       | -1.715894     | -1.024894     |
| C | -4.739163     | -1.79553      | -0.047505     |
| O | -5.12587      | -2.883587     | 0.374854      |
| H | -2.3799912306 | 0.0213568146  | -1.3713229357 |
| H | -3.755779     | -2.408878     | -1.849017     |
| H | -2.6838       | -1.986054     | -0.471917     |
| N | -5.277109     | -0.639246     | 0.321318      |
| H | -4.887908     | 0.218914      | -0.041304     |
| H | -6.063749     | -0.618211     | 0.954663      |
| H | -4.787723     | 1.641034      | -4.552073     |
| O | 4.1443884752  | 1.256223103   | 6.1158211834  |
| H | 3.4354337253  | 1.5050671085  | 6.7348683073  |
| H | 4.7548296022  | 2.0134524821  | 6.0761292962  |

**Table S10.** Cartesian coordinates of model **5B**:  $\text{Fe}^{\text{IV}}(\text{Por})^{2-}(\text{His}\cdots\text{H}_2\text{O})^0(\text{O}\cdots\text{HB})^{2-}$  with twisted His

|   |              |               |              |
|---|--------------|---------------|--------------|
| C | 4.8196830949 | -3.4327028229 | 2.8483196269 |
| C | 3.7482832393 | -2.4705157351 | 2.4441887399 |
| N | 2.4920540856 | -2.4699624377 | 3.0116577786 |
| C | 3.7350677809 | -1.4975681784 | 1.5000637035 |
| C | 1.7695419877 | -1.5002597083 | 2.3986613819 |
| N | 2.4694326405 | -0.8932334098 | 1.448438715  |
| H | 4.6923450678 | -3.6991780486 | 3.8971655902 |

|    |               |               |               |
|----|---------------|---------------|---------------|
| H  | 4.730296125   | -4.3192856662 | 2.2202328166  |
| H  | 2.1498709449  | -3.075695103  | 3.776146572   |
| H  | 4.5271228781  | -1.1930883643 | 0.8194316696  |
| H  | 0.7486767905  | -1.2748356235 | 2.6842780808  |
| H  | 5.8147685089  | -3.0129044563 | 2.6989116274  |
| Fe | 0.9235264528  | 0.2829525457  | -0.1509364325 |
| C  | -1.3593797728 | 0.5044382972  | 2.437331075   |
| C  | 2.1732069005  | 3.324877036   | 0.7421140993  |
| C  | 3.2572413431  | 0.0555015941  | -2.6800899338 |
| C  | -0.2150542171 | -2.8303163711 | -0.8868221233 |
| N  | 0.5198318952  | 1.6214851375  | 1.3148908446  |
| C  | -0.5273801645 | 1.5884210445  | 2.2056452409  |
| C  | -0.6484182155 | 2.838776048   | 2.9170179537  |
| C  | 0.3650328073  | 3.6517223764  | 2.453512704   |
| C  | 1.0755582667  | 2.8706977239  | 1.4566919468  |
| C  | 0.7133727496  | 5.0680432604  | 2.8558558389  |
| C  | -1.6333452574 | 3.1478954312  | 4.0117889789  |
| N  | 2.4649892636  | 1.4063504369  | -0.7750413891 |
| C  | 2.8133845285  | 2.6424427114  | -0.279223414  |
| C  | 3.9323087099  | 3.2032400693  | -1.0092038857 |
| C  | 4.2448291608  | 2.2890965374  | -1.9850465902 |
| C  | 3.3093422303  | 1.1738751428  | -1.8412682983 |
| C  | 4.5851554232  | 4.5300176319  | -0.6843942716 |
| C  | 5.3613500278  | 2.4104976806  | -2.9772163902 |
| N  | 1.4601289491  | -1.1349407596 | -1.5220885056 |
| C  | 2.3745504549  | -1.0207348177 | -2.5560080894 |
| C  | 2.2890836673  | -2.1831867842 | -3.4575562211 |
| C  | 1.3125102307  | -2.9874516402 | -2.9113275678 |
| C  | 0.7988444016  | -2.3257244228 | -1.7129586727 |
| C  | 3.1167656197  | -2.4777657995 | -4.7318254212 |
| C  | 0.8173451602  | -4.2679739184 | -3.5278135969 |
| N  | -0.4769254508 | -0.9454414427 | 0.6715449924  |
| C  | -0.804855679  | -2.2027877825 | 0.219697857   |
| C  | -1.8912114845 | -2.7518053191 | 1.0336970414  |
| C  | -2.1835104663 | -1.8263733074 | 2.0129229265  |
| C  | -1.3218595858 | -0.6908780234 | 1.7362327561  |
| C  | -2.5765209667 | -4.0609774972 | 0.8137987561  |
| C  | -3.263509599  | -1.8881059473 | 3.092798495   |
| H  | -2.1058841285 | 0.6152676607  | 3.226355746   |
| H  | 2.5572224879  | 4.318848709   | 0.9758880759  |
| H  | 3.9624453594  | 0.0295909089  | -3.5157093562 |
| H  | -0.6204439067 | -3.8100836187 | -1.1528117105 |
| H  | 1.5659286334  | 5.4119220667  | 2.2702741313  |
| H  | -0.141038653  | 5.7182814231  | 2.6694863649  |
| H  | 0.9651900404  | 5.0949149616  | 3.9157764018  |
| H  | -1.3597129941 | 2.6147696425  | 4.9224418839  |
| H  | -1.5815124533 | 4.2310084044  | 4.1212097498  |
| H  | 5.4353149794  | 4.6944960404  | -1.3459400245 |
| H  | 3.8668992579  | 5.3411173649  | -0.8076830098 |
| H  | 4.9285242683  | 4.5031699712  | 0.3501980026  |
| H  | 5.899677842   | 3.3337536364  | -2.7642817908 |
| H  | 2.8276181129  | -3.4251263053 | -5.1869535264 |
| H  | 2.9851103035  | -1.6728889271 | -5.4543574889 |
| H  | 4.1623834215  | -2.5253800809 | -4.4263691957 |
| H  | 1.68819732    | -4.8512584127 | -3.8259900397 |
| H  | -3.3258556644 | -4.2094534187 | 1.5917379301  |
| H  | -3.0536138125 | -4.1127635488 | -0.1646652116 |

|   |               |               |               |
|---|---------------|---------------|---------------|
| H | -1.8163804987 | -4.8380880693 | 0.8885121448  |
| H | -3.2834031936 | -0.958052707  | 3.6611105994  |
| H | -4.2026651612 | -2.0857559405 | 2.5752987655  |
| O | -0.1995468427 | 0.9618747479  | -1.1670665643 |
| H | -2.6844123776 | 2.9658139277  | 3.7861029948  |
| H | 6.0382038643  | 1.5625236799  | -2.8701788486 |
| H | 4.976333543   | 2.4421144626  | -3.9964564409 |
| H | 0.2519201051  | -3.9787489576 | -4.4139324488 |
| H | 0.243765682   | -4.8698125645 | -2.8218379075 |
| H | -3.1626555312 | -2.7298857165 | 3.778473601   |
| N | -5.0548621745 | 3.2601114231  | -2.6626759333 |
| C | -4.0288326323 | 2.5259262517  | -1.9505027347 |
| C | -4.2466472302 | 1.0252947862  | -2.165696914  |
| O | -5.2419368115 | 0.5817851917  | -2.7400710418 |
| C | -3.9677151875 | 2.9586920664  | -0.4861494737 |
| O | -5.1697857221 | 2.6473284996  | 0.1924041637  |
| H | -5.9592657353 | 2.8587664023  | -2.4584382306 |
| H | -3.0622369802 | 2.7354304089  | -2.4083181132 |
| H | -3.1327674987 | 2.4596876058  | 0.0061183686  |
| H | -3.8284211302 | 4.0396780019  | -0.4550425079 |
| H | -5.0775268682 | 2.9091639136  | 1.2047070076  |
| N | -3.281828475  | 0.2182498976  | -1.651409564  |
| C | -3.4892976613 | -1.209985076  | -1.725428974  |
| C | -4.6272813102 | -1.7170987692 | -0.8624174694 |
| O | -4.962618785  | -2.8993493629 | -0.9027663745 |
| H | -2.3596134113 | 0.5760516461  | -1.3732716537 |
| H | -3.6435443871 | -1.5307300746 | -2.7561479262 |
| H | -2.5716657518 | -1.6359919137 | -1.3193748226 |
| N | -5.2079017809 | -0.8229695996 | -0.0713288529 |
| H | -4.8596942141 | 0.1247315927  | -0.066304782  |
| H | -5.9861388826 | -1.0864902879 | 0.516271689   |
| H | -4.8795462869 | 3.2059266625  | -3.6559194059 |
| O | 1.2697888594  | -4.0978320658 | 5.0343406332  |
| H | 0.5618835649  | -4.649689384  | 4.6558999243  |
| H | 0.8782517535  | -3.6406512167 | 5.7998152179  |

**Table S11.** Cartesian coordinates of model **6A**:  $\text{Fe}^{\text{IV}}(\text{Por})^{2-}(\text{His})^0(\text{OH}\cdots\text{HB})^{1-}$

|    |               |               |               |
|----|---------------|---------------|---------------|
| C  | 4.640732866   | -2.3180776843 | 4.1622179739  |
| C  | 3.7064556897  | -1.4498808338 | 3.3427022903  |
| N  | 3.5370481946  | -0.1009386748 | 3.6390901408  |
| C  | 2.9903494675  | -1.6238960666 | 2.1727700018  |
| C  | 2.7617722886  | 0.4764252898  | 2.6853276667  |
| N  | 2.4110636295  | -0.4213037133 | 1.7681141885  |
| H  | 4.5077219342  | -2.1472702356 | 5.2301287734  |
| H  | 4.5097558401  | -3.3751622198 | 3.9299932932  |
| H  | 3.9370886425  | 0.3816422418  | 4.4406441073  |
| H  | 2.8734683212  | -2.5358753312 | 1.5924514725  |
| H  | 2.4736066552  | 1.5236409068  | 2.7006176804  |
| H  | 5.6521791183  | -2.0322587064 | 3.8723336265  |
| Fe | 1.0402259857  | 0.0440414357  | 0.0587282659  |
| C  | -1.2443661237 | 1.3826314002  | 2.2976589547  |
| C  | 2.3254390656  | 3.1827406756  | -0.4250615152 |
| C  | 3.2562221028  | -1.234246335  | -2.2640394481 |
| C  | -0.3352168858 | -3.0357812558 | 0.4949040618  |

|   |               |               |               |
|---|---------------|---------------|---------------|
| N | 0.6653045319  | 1.8922786752  | 0.8413270101  |
| C | -0.3977612727 | 2.2562867603  | 1.6458886125  |
| C | -0.525998702  | 3.690290378   | 1.7396906498  |
| C | 0.51419679    | 4.2219922436  | 0.9924150679  |
| C | 1.2303579953  | 3.0891728317  | 0.4280061487  |
| C | 0.9051754243  | 5.6713816502  | 0.7949216067  |
| C | -1.5158924637 | 4.4567341406  | 2.5819002532  |
| N | 2.5435755197  | 0.7921037453  | -1.0102358564 |
| C | 2.9315924479  | 2.1236363644  | -1.0667106711 |
| C | 4.0346164067  | 2.310383644   | -1.9741867167 |
| C | 4.3036423206  | 1.0666410795  | -2.5131279913 |
| C | 3.3636366893  | 0.1183950767  | -1.9248562751 |
| C | 4.7308203246  | 3.6293664024  | -2.2064393565 |
| C | 5.4023470462  | 0.7511635804  | -3.4780022089 |
| N | 1.4523951324  | -1.7999493448 | -0.7124632861 |
| C | 2.3336220659  | -2.1352567258 | -1.7293931296 |
| C | 2.1527958911  | -3.5350360416 | -2.1448763377 |
| C | 1.1363296724  | -4.0200310355 | -1.3386377377 |
| C | 0.6929739532  | -2.9409759453 | -0.4542134489 |
| C | 2.9394025136  | -4.3353328864 | -3.2070822042 |
| C | 0.5714560337  | -5.4136908063 | -1.4261289558 |
| N | -0.400195464  | -0.7041142221 | 1.2920287962  |
| C | -0.8580427143 | -2.0053665968 | 1.2929780883  |
| C | -2.0206559764 | -2.1313145597 | 2.1748256299  |
| C | -2.2497852654 | -0.8810604139 | 2.7307115028  |
| C | -1.2546397847 | 0.0029341647  | 2.1378386527  |
| C | -2.7866502222 | -3.3823837068 | 2.4478472685  |
| C | -3.3668282431 | -0.4642767479 | 3.6868813881  |
| H | -1.9907885312 | 1.8306925251  | 2.9559256261  |
| H | 2.7206747828  | 4.1727972579  | -0.6536863137 |
| H | 3.9345553097  | -1.6156140914 | -3.0315773401 |
| H | -0.8256200102 | -4.0070125077 | 0.5964770235  |
| H | 1.768578474   | 5.7226810125  | 0.1316605589  |
| H | 0.0786174684  | 6.2319568076  | 0.3588942149  |
| H | 1.1636798313  | 6.1003327384  | 1.7627754484  |
| H | -1.2605717778 | 4.3115536746  | 3.6317188948  |
| H | -1.4167752551 | 5.4930880567  | 2.2595029983  |
| H | 5.5836742296  | 3.4861160389  | -2.8694517468 |
| H | 4.0475743397  | 4.3568104503  | -2.6457255314 |
| H | 5.0783331379  | 3.9951906388  | -1.2397896183 |
| H | 5.9811637749  | 1.6607162006  | -3.6368250493 |
| H | 2.6071722673  | -5.3722483459 | -3.2587434915 |
| H | 2.8386734562  | -3.8726550746 | -4.1884067458 |
| H | 3.9836381182  | -4.3033152821 | -2.8949368971 |
| H | 1.4146919525  | -6.1030237716 | -1.4619930459 |
| H | -3.537450762  | -3.1830936206 | 3.2129073393  |
| H | -3.2708484588 | -3.792937998  | 1.5620200609  |
| H | -2.0603564872 | -4.0993451243 | 2.8296352721  |
| H | -3.3434767636 | 0.6139505748  | 3.8457934983  |
| H | -4.3164389736 | -0.8091996214 | 3.2768160752  |
| O | -0.2086447826 | 0.3182888599  | -1.1978558734 |
| H | -2.5750498082 | 4.2450030061  | 2.4329520372  |
| H | 6.0425497976  | -0.0148075235 | -3.0397375504 |
| H | 5.0135140996  | 0.3974735533  | -4.4328857885 |
| H | 0.0142266228  | -5.4709204605 | -2.3614277412 |
| H | -0.0237107095 | -5.6666890325 | -0.5478503862 |
| H | -3.2986643983 | -0.974013233  | 4.6483571643  |

|   |               |               |               |
|---|---------------|---------------|---------------|
| N | -4.9656347904 | 2.0910935207  | -3.6447259177 |
| C | -3.9683838727 | 1.651929749   | -2.6899583699 |
| C | -4.2861792983 | 0.2003307033  | -2.2912669338 |
| O | -5.3172197668 | -0.3783650129 | -2.6337913297 |
| C | -3.8806849257 | 2.620265971   | -1.5109813925 |
| O | -5.0913624002 | 2.649863975   | -0.7790402084 |
| H | -5.885390839  | 1.8399025186  | -3.3105272812 |
| H | -2.9961533777 | 1.6249281031  | -3.181722104  |
| H | -3.0653828078 | 2.3192419453  | -0.8528501503 |
| H | -3.6947062006 | 3.6203581809  | -1.9035728031 |
| H | -4.9823855231 | 3.2828573414  | 0.0511828648  |
| N | -3.3524458237 | -0.3743003428 | -1.4883637438 |
| C | -3.5893482057 | -1.7169755584 | -1.0149672961 |
| C | -4.743443329  | -1.797825759  | -0.0359449836 |
| O | -5.1296999327 | -2.8864257363 | 0.3854258621  |
| H | -2.4395083706 | 0.0266966106  | -1.3825403231 |
| H | -3.7628961589 | -2.4087374745 | -1.8398295336 |
| H | -2.6887587962 | -1.988089865  | -0.4637452207 |
| N | -5.2806283679 | -0.641983653  | 0.3353638538  |
| H | -4.8918273858 | 0.216632758   | -0.0266062749 |
| H | -6.066304474  | -0.6217290109 | 0.9699295758  |
| H | -4.7982267818 | 1.6452566287  | -4.5354611254 |
| H | 0.2219573571  | 0.5045439314  | -2.0802794331 |

**Table S12.** Cartesian coordinates of model **7A**:  $\text{Fe}^{\text{IV}}(\text{Por})^{2-}(\text{His})^0(\text{O}\cdots\text{HB})^{2-}(\text{distalHis})\text{-1}$

|    |               |               |               |
|----|---------------|---------------|---------------|
| C  | 1.5208647814  | -4.9646429406 | 4.7043908972  |
| C  | 1.7329190448  | -4.0452571656 | 3.5165142725  |
| N  | 2.9188803908  | -4.0712565805 | 2.7865386943  |
| C  | 0.9232252476  | -3.1796831009 | 2.799280843   |
| C  | 2.7888426772  | -3.2507083284 | 1.7038905733  |
| N  | 1.5866477629  | -2.6938830208 | 1.6795534753  |
| H  | 2.4184144618  | -5.0272146929 | 5.3190374192  |
| H  | 0.6730909279  | -4.6376351663 | 5.3067673648  |
| H  | 3.750424491   | -4.6061216834 | 3.0252053502  |
| H  | -0.0988360994 | -2.8764128287 | 3.0125895876  |
| H  | 3.5787341963  | -3.0760857402 | 0.9781910441  |
| H  | 1.2875853796  | -5.9505744403 | 4.3015648821  |
| Fe | 0.9853368802  | -1.0728049782 | 0.0857013418  |
| C  | 3.969141182   | 0.5467547578  | 0.6940378919  |
| C  | 2.4993811348  | -2.8116767408 | -2.4497070108 |
| C  | -1.9704582    | -2.7468850597 | -0.5516742017 |
| C  | -0.4690741487 | 0.6031394048  | 2.6340243138  |
| N  | 2.8731028707  | -1.1656504262 | -0.6830184179 |
| C  | 3.9186461443  | -0.3197619305 | -0.3874593745 |
| C  | 4.9907575058  | -0.4617017845 | -1.3449401819 |
| C  | 4.5957153557  | -1.4432572695 | -2.2336227427 |
| C  | 3.2703432986  | -1.8535775635 | -1.808226894  |
| C  | 5.3499592249  | -2.0291913218 | -3.4101447973 |
| C  | 6.3217435217  | 0.2427490082  | -1.3067771601 |
| N  | 0.4095812463  | -2.5516524084 | -1.1670393138 |
| C  | 1.1867766506  | -3.1339652855 | -2.1434913412 |
| C  | 0.4359077938  | -4.12100362   | -2.8927293139 |
| C  | -0.8332627248 | -4.1087628281 | -2.3689705255 |
| C  | -0.8446507677 | -3.1103469938 | -1.2992800372 |

|   |               |               |               |
|---|---------------|---------------|---------------|
| C | 1.018469397   | -4.9803190474 | -3.9954566956 |
| C | -1.9658964663 | -4.9937644926 | -2.7932692669 |
| N | -0.8801661797 | -1.1156963936 | 0.9155546873  |
| C | -2.0065935726 | -1.7885702602 | 0.4649868274  |
| C | -3.2029301099 | -1.3588508511 | 1.210627787   |
| C | -2.7415083842 | -0.4203395804 | 2.1103160686  |
| C | -1.3003767446 | -0.2699173533 | 1.9160668153  |
| C | -4.6645938815 | -1.8478596386 | 1.0579959682  |
| C | -3.6168106045 | 0.3521556187  | 3.0589724977  |
| N | 1.6725647019  | 0.2173188314  | 1.4847634127  |
| C | 0.9003805106  | 0.8363236202  | 2.4379563672  |
| C | 1.7052307104  | 1.8267301193  | 3.1574968293  |
| C | 2.9802095024  | 1.77811326    | 2.6394049253  |
| C | 2.9252647245  | 0.7905878539  | 1.5734768167  |
| C | 1.2205888914  | 2.7131087409  | 4.2574037526  |
| C | 4.1889072119  | 2.6363228069  | 3.0042675794  |
| H | 4.8949912422  | 1.1089657156  | 0.8300208382  |
| H | 2.941882047   | -3.3371845403 | -3.2974279507 |
| H | -2.9133058604 | -3.2408916756 | -0.8027267472 |
| H | -0.9484968291 | 1.2044652191  | 3.4111467211  |
| H | 4.7276270135  | -2.776448546  | -3.9024051547 |
| H | 5.60132816    | -1.2414267486 | -4.1199353549 |
| H | 6.2652273939  | -2.4980521393 | -3.049563721  |
| H | 6.9084636135  | -0.1471551973 | -0.4748395156 |
| H | 6.7713062147  | 0.0362362792  | -2.2778795634 |
| H | 0.2674628108  | -5.6873012027 | -4.3470691804 |
| H | 1.3486529875  | -4.3576281698 | -4.8274476016 |
| H | 1.8708380947  | -5.5260993883 | -3.5897530814 |
| H | -1.591487282  | -5.6741895102 | -3.5577171449 |
| H | -5.327334847  | -1.3556641623 | 1.7698660587  |
| H | -5.0228072319 | -1.6684328192 | 0.0447328178  |
| H | -4.6515059611 | -2.9202014052 | 1.2549752618  |
| H | -4.2914925739 | -0.3586635931 | 3.5354746365  |
| H | 2.0590090205  | 3.2960065834  | 4.6395278062  |
| H | 0.4250074481  | 3.3865949571  | 3.9393495375  |
| H | 0.8474890949  | 2.055735961   | 5.0422314853  |
| H | 5.0227914831  | 2.4224609958  | 2.33548275    |
| H | 3.87507909    | 3.6798409686  | 2.9659562758  |
| O | 0.5847996902  | 0.1732272569  | -0.941574852  |
| H | 6.3058806338  | 1.3320131337  | -1.2611478526 |
| H | -2.3133479885 | -5.5683535384 | -1.934333374  |
| H | -2.7927362949 | -4.4113693252 | -3.1997674426 |
| H | -4.193095081  | 1.0500692358  | 2.4512095627  |
| H | -3.0375312825 | 0.8353903827  | 3.8467063551  |
| H | 4.5085263248  | 2.4990172596  | 4.0376623778  |
| N | 1.0903006178  | 4.9416312774  | -3.9183591642 |
| C | 1.2493065928  | 3.8879503108  | -2.9368152168 |
| C | 0.5971426824  | 4.324182508   | -1.6216697291 |
| O | 0.1441310085  | 5.4583042555  | -1.4583688301 |
| C | 2.7145340001  | 3.4696995183  | -2.8205013335 |
| O | 3.5158985189  | 4.5326404557  | -2.3405789735 |
| H | 1.3581035298  | 5.8258670339  | -3.5095245678 |
| H | 0.6713223294  | 3.0199325476  | -3.2534733198 |
| H | 2.7972760856  | 2.6183426827  | -2.1446202154 |
| H | 3.0711156967  | 3.1949416709  | -3.8136068763 |
| H | 4.5043895963  | 4.1995850693  | -2.2231630479 |
| N | 0.5702590758  | 3.3823400223  | -0.6429212241 |



|   |                |               |               |
|---|----------------|---------------|---------------|
| C | 0.076579366    | 3.7775973151  | 0.6564174597  |
| C | 0.9653755609   | 4.763965727   | 1.3872229606  |
| O | 0.6132834881   | 5.2433223544  | 2.4633476727  |
| H | 0.7561202948   | 2.3885409973  | -0.8267977489 |
| H | -0.9336096964  | 4.1818913452  | 0.5848954672  |
| H | 0.0853981046   | 2.8550272906  | 1.2371039325  |
| N | 2.1241523643   | 5.0520379688  | 0.8069991216  |
| H | 2.3625392273   | 4.5964531552  | -0.0619227282 |
| H | 2.7574625757   | 5.7168739729  | 1.2280469381  |
| H | 0.1247763195   | 4.9855391239  | -4.211684803  |
| N | -8.479965677   | -1.2429662237 | 0.1882586408  |
| C | -8.9768613705  | 0.010462575   | 0.7550306767  |
| C | -8.9461751589  | 1.152563719   | -0.2819620922 |
| C | -7.6273517637  | 1.3438828282  | -0.9733519033 |
| N | -7.311608663   | 0.6242037605  | -2.1164118885 |
| C | -6.5740750858  | 2.1724977786  | -0.6328064118 |
| C | -6.0912877614  | 1.0053218749  | -2.453640479  |
| N | -5.5974673134  | 1.9427777553  | -1.5860212864 |
| H | -8.6745284186  | -1.2964158195 | -0.7911740878 |
| H | -8.3453607956  | 0.2965597994  | 1.6198437446  |
| H | -9.7051719588  | 0.9452784174  | -1.0587818297 |
| H | -9.2538977441  | 2.0851447581  | 0.221876704   |
| H | -6.4305998039  | 2.8892548744  | 0.1725011621  |
| H | -5.5209093733  | 0.6456663417  | -3.3093761851 |
| H | -4.6869648236  | 2.394291506   | -1.6312452637 |
| H | -8.6859000879  | -2.0207386657 | 0.782111352   |
| H | -10.0228605808 | -0.0515804954 | 1.137482256   |

**Table S13.** Cartesian coordinates of model **8A**:  $\text{Fe}^{\text{IV}}(\text{Por})^{2-}(\text{His})^0(\text{O}^{\cdots}\text{HB})^{2-}(\text{distalHis})\text{-2}$

|    |               |               |               |
|----|---------------|---------------|---------------|
| C  | 0.3564838628  | -4.8437282878 | 4.9680408791  |
| C  | 0.7326109186  | -4.0595641549 | 3.7236429794  |
| N  | 1.857374009   | -4.3928688994 | 2.9727066987  |
| C  | 0.1189680789  | -3.0682984646 | 2.9745029928  |
| C  | 1.8853968128  | -3.6209207224 | 1.8494267159  |
| N  | 0.8413285142  | -2.8040795446 | 1.8169708189  |
| H  | 1.2373979508  | -5.0928412001 | 5.5590012216  |
| H  | -0.3613178707 | -4.2916377742 | 5.5750571361  |
| H  | 2.5521164144  | -5.0921320667 | 3.2239305969  |
| H  | -0.798506318  | -2.5271330314 | 3.1918378057  |
| H  | 2.6702079776  | -3.6650371527 | 1.1004466836  |
| H  | -0.1244504202 | -5.7616519232 | 4.6291199222  |
| Fe | 0.5786333305  | -1.1987404643 | 0.1630195728  |
| C  | 3.8947916064  | -0.3009544636 | 0.5897184643  |
| C  | 1.5280044256  | -3.3559288794 | -2.3067948523 |
| C  | -2.7133904635 | -2.1165638752 | -0.2876770226 |
| C  | -0.3163391464 | 0.9313188659  | 2.6465343677  |
| N  | 2.3630034965  | -1.7643098216 | -0.6491757465 |
| C  | 3.5924378247  | -1.1812490153 | -0.4378382411 |
| C  | 4.5541058136  | -1.6212876958 | -1.4221818139 |
| C  | 3.8963462551  | -2.5189977311 | -2.2416529908 |
| C  | 2.5327982102  | -2.5806889154 | -1.7475077251 |
| C  | 4.4367666842  | -3.3236977621 | -3.4084338745 |
| C  | 6.0153150061  | -1.2571829203 | -1.46731703   |
| N  | -0.3827790909 | -2.5532043359 | -0.9672476275 |

|   |               |               |               |
|---|---------------|---------------|---------------|
| C | 0.1910656536  | -3.3426336681 | -1.9405346869 |
| C | -0.8085978471 | -4.1379013714 | -2.6225728394 |
| C | -2.01569264   | -3.7918193112 | -2.0643303001 |
| C | -1.7415968067 | -2.7849476409 | -1.0403988182 |
| C | -0.4993722324 | -5.1578039607 | -3.6984960195 |
| C | -3.3456900476 | -4.3869899889 | -2.4115633422 |
| N | -1.201654017  | -0.7275170372 | 1.0521716102  |
| C | -2.4753694341 | -1.1271184924 | 0.6701983656  |
| C | -3.4990683698 | -0.3720131301 | 1.4129833905  |
| C | -2.7883569767 | 0.4683443276  | 2.2452710974  |
| C | -1.362928909  | 0.2495423637  | 2.00721272    |
| C | -5.0417041177 | -0.4967144103 | 1.3302572302  |
| C | -3.4111181156 | 1.4766860606  | 3.1711004802  |
| N | 1.6172450642  | -0.0248725414 | 1.4604784095  |
| C | 1.0586917661  | 0.813142434   | 2.3967387018  |
| C | 2.1087153623  | 1.6134418314  | 3.0329252596  |
| C | 3.3115997536  | 1.2301545576  | 2.4827833693  |
| C | 2.9749394162  | 0.2313179202  | 1.4807515536  |
| C | 1.8988690205  | 2.6457028315  | 4.0920822413  |
| C | 4.7057219841  | 1.7889107504  | 2.7599246791  |
| H | 4.9314196323  | 0.0332166331  | 0.6630593805  |
| H | 1.7935856127  | -4.0049369093 | -3.1424857595 |
| H | -3.7570514285 | -2.3703215198 | -0.4926734978 |
| H | -0.6036927522 | 1.6709447266  | 3.3984049183  |
| H | 3.6324528184  | -3.9201276211 | -3.8389703171 |
| H | 4.8407554087  | -2.6560002495 | -4.1690488508 |
| H | 5.2261833762  | -3.9830196778 | -3.0483215339 |
| H | 6.52500881    | -1.7373135293 | -0.6318095049 |
| H | 6.3606299016  | -1.6135593527 | -2.4376507155 |
| H | -1.4128261709 | -5.6771216412 | -3.9872468618 |
| H | -0.0639191774 | -4.6751046778 | -4.5739136566 |
| H | 0.2123959384  | -5.8741659694 | -3.2871378503 |
| H | -3.1789032937 | -5.17420781   | -3.1464179407 |
| H | -5.5356609421 | 0.175714517   | 2.0317463558  |
| H | -5.38823295   | -0.2848277645 | 0.3192009421  |
| H | -5.2794553698 | -1.5292266276 | 1.5877098729  |
| H | -4.2167559286 | 0.975170957   | 3.7067723155  |
| H | 2.8684196843  | 3.025031948   | 4.4158382167  |
| H | 1.2766455538  | 3.4762177142  | 3.7592534761  |
| H | 1.411460678   | 2.137557057   | 4.9236578419  |
| H | 5.4345677132  | 1.3465970817  | 2.080575342   |
| H | 4.6515916146  | 2.87430417    | 2.6711720584  |
| O | 0.4188457094  | 0.046665382   | -0.9414997707 |
| H | 6.2646361842  | -0.1958603553 | -1.4835455016 |
| H | -3.7851502766 | -4.8175863785 | -1.5115036462 |
| H | -4.0239065077 | -3.6414021473 | -2.8265455149 |
| H | -3.8269816703 | 2.2635219471  | 2.5414102456  |
| H | -2.6998466574 | 1.8421047932  | 3.912832954   |
| H | 5.0258379555  | 1.6281889592  | 3.7897830531  |
| N | 1.9671945495  | 4.4406468553  | -4.1904230907 |
| C | 1.9083347639  | 3.4287031443  | -3.1553093522 |
| C | 1.439718329   | 4.0753156726  | -1.8503021506 |
| O | 1.2814409473  | 5.2903475242  | -1.7338032816 |
| C | 3.232929709   | 2.672865183   | -3.0577839313 |
| O | 4.2864669645  | 3.5309937127  | -2.6627792757 |
| H | 2.4573190804  | 5.2519460112  | -3.8406965921 |
| H | 1.1252518225  | 2.7129982269  | -3.4049903048 |

|   |               |               |               |
|---|---------------|---------------|---------------|
| H | 3.1361158147  | 1.8606795864  | -2.3370540051 |
| H | 3.4707070531  | 2.2719179646  | -4.043483816  |
| H | 5.1694394115  | 2.9736644978  | -2.5552116038 |
| N | 1.2238161337  | 3.2160967348  | -0.8177494443 |
| C | 0.8954304109  | 3.780849643   | 0.4708188329  |
| C | 2.0257892545  | 4.5556790184  | 1.1180331126  |
| O | 1.8452074683  | 5.1577636374  | 2.1747640765  |
| H | 1.1865247215  | 2.1995119493  | -0.9445072111 |
| H | 0.0105323465  | 4.4146904837  | 0.4056099042  |
| H | 0.7057698458  | 2.9130416701  | 1.1027588555  |
| N | 3.1944440543  | 4.5249164833  | 0.4889793587  |
| H | 3.2792098629  | 3.983537298   | -0.3590385276 |
| H | 3.9865299414  | 5.0353825088  | 0.8528397498  |
| H | 1.0293525866  | 4.7037577933  | -4.4576871676 |
| N | -5.5048620434 | 1.7580019271  | -5.912651369  |
| C | -5.4060831614 | 2.6349330078  | -4.7363291812 |
| C | -3.9455429894 | 3.0784783092  | -4.525561877  |
| C | -3.0537822043 | 1.9900787834  | -3.9945718194 |
| N | -2.9717624672 | 0.7471091404  | -4.6078370642 |
| C | -2.2224433633 | 2.0141670675  | -2.8876375916 |
| C | -2.1080071469 | 0.0491034646  | -3.8822407909 |
| N | -1.6220618892 | 0.7697691498  | -2.8307019681 |
| H | -4.820022817  | 0.9982102943  | -5.7914438686 |
| H | -5.7711637761 | 2.1794528952  | -3.7859612868 |
| H | -3.5659410994 | 3.4405751822  | -5.4997839128 |
| H | -3.9188791516 | 3.9338987145  | -3.8283595513 |
| H | -2.0082851447 | 2.7866026527  | -2.1526723841 |
| H | -1.8002987121 | -0.9778041333 | -4.0741107408 |
| H | -0.9407264034 | 0.4436224455  | -2.1216156328 |
| H | -6.4358338242 | 1.328102664   | -5.9410766125 |
| H | -6.0263121132 | 3.5334147842  | -4.9172762323 |

**Table S14.** Cartesian coordinates of model **9A**:  $\text{Fe}^{\text{IV}}(\text{Por})^{2-}(\text{His})^0(\text{O}^{\cdots}\text{HB})^{2-}(\text{distalHis})\text{-3}$

|    |               |               |               |
|----|---------------|---------------|---------------|
| C  | -4.8457473236 | -5.0107966615 | -2.112084197  |
| C  | -4.0628076602 | -3.9961204967 | -1.2976482027 |
| N  | -4.3292430885 | -3.7962275871 | 0.05487814    |
| C  | -2.9427330201 | -3.21438533   | -1.5313214175 |
| C  | -3.4034935162 | -2.9343719922 | 0.56588859    |
| N  | -2.5428839495 | -2.5617807357 | -0.3709023751 |
| H  | -5.9094496857 | -4.9664446301 | -1.8799825338 |
| H  | -4.6859200467 | -4.8596110831 | -3.1798436093 |
| H  | -5.0939864752 | -4.2171805242 | 0.5770657975  |
| H  | -2.3933935869 | -3.0804041588 | -2.4598662294 |
| H  | -3.395062334  | -2.5974152172 | 1.5989260542  |
| H  | -4.4578791152 | -5.9953413047 | -1.8494454744 |
| Fe | -0.8533426493 | -0.9881195881 | 0.0407859166  |
| C  | -3.2261408013 | 1.0520217928  | 1.5070515507  |
| C  | -0.1591086183 | -2.3089349862 | 3.1262368266  |
| C  | 1.5021925283  | -3.0784355782 | -1.3740922428 |
| C  | -1.5844764677 | 0.3146422452  | -2.9893065347 |
| N  | -1.5892285062 | -0.7297458333 | 1.9295773833  |
| C  | -2.4609174498 | 0.2537392188  | 2.3433565226  |
| C  | -2.5038976809 | 0.3404847505  | 3.7844796433  |
| C  | -1.6507828619 | -0.6360958727 | 4.2622653535  |

|   |               |               |               |
|---|---------------|---------------|---------------|
| C | -1.0856801258 | -1.2779157657 | 3.0895710215  |
| C | -1.3451955823 | -1.022120206  | 5.6956765345  |
| C | -3.3915731642 | 1.2452850379  | 4.5995719536  |
| N | 0.3327260473  | -2.4768976098 | 0.7139441745  |
| C | 0.4836418539  | -2.8609517813 | 2.0292781189  |
| C | 1.4825349817  | -3.9015557616 | 2.1587842483  |
| C | 1.9655961809  | -4.1244068044 | 0.8919394207  |
| C | 1.2518148868  | -3.2163157399 | -0.0043720795 |
| C | 1.8385483433  | -4.5846010182 | 3.4627291373  |
| C | 2.9942399393  | -5.1449538413 | 0.5127703836  |
| N | -0.1948839308 | -1.3761075578 | -1.8509340819 |
| C | 0.85482107    | -2.195541503  | -2.2426539708 |
| C | 1.1588532332  | -1.9980636158 | -3.6697762951 |
| C | 0.2526742609  | -1.0512995808 | -4.1011077184 |
| C | -0.5712229267 | -0.6558880553 | -2.9617570103 |
| C | 2.2313735448  | -2.7053506335 | -4.5348330133 |
| C | 0.2031514799  | -0.4905866007 | -5.4955408435 |
| N | -2.2364724746 | 0.3349573414  | -0.6171986746 |
| C | -2.3567690275 | 0.7744964195  | -1.9138028866 |
| C | -3.3799289075 | 1.8192123785  | -1.9876732487 |
| C | -3.8839429847 | 1.9954623516  | -0.7183558522 |
| C | -3.1292924392 | 1.0822903687  | 0.1248199235  |
| C | -3.8110294012 | 2.5340850335  | -3.2265136603 |
| C | -4.9245680472 | 3.0060216519  | -0.2391289325 |
| H | -3.92589329   | 1.7382500257  | 1.9875600195  |
| H | 0.1273262488  | -2.7010509602 | 4.1031026237  |
| H | 2.3024854315  | -3.6934872579 | -1.7943055583 |
| H | -1.7788339387 | 0.7902685932  | -3.9542613526 |
| H | -0.6114039562 | -1.8280321547 | 5.7038484627  |
| H | -0.9471922439 | -0.163267316  | 6.2356089894  |
| H | -2.2624133046 | -1.3600840222 | 6.177399597   |
| H | -4.4234493909 | 0.9045712271  | 4.5127874393  |
| H | -3.0033678093 | 1.1715624714  | 5.6152764311  |
| H | 2.5600976659  | -5.3797387091 | 3.2767489566  |
| H | 2.2611141846  | -3.8685448092 | 4.1681904156  |
| H | 0.9262299179  | -5.0110806971 | 3.8808130692  |
| H | 3.2518458825  | -5.710035694  | 1.4082382377  |
| H | 2.1961648841  | -2.3684972899 | -5.5709465086 |
| H | 3.2259611706  | -2.5248040366 | -4.1281250334 |
| H | 2.0084106669  | -3.7717939614 | -4.4915296264 |
| H | 0.2686734504  | -1.3270074051 | -6.190969567  |
| H | -4.6225245517 | 3.2190308217  | -2.9794066229 |
| H | -2.9929149975 | 3.0901935125  | -3.6838146356 |
| H | -4.1722497937 | 1.7798489894  | -3.9250441305 |
| H | -5.0190835004 | 2.9681041348  | 0.8462291149  |
| H | -4.6143048334 | 3.9866791005  | -0.6009765616 |
| O | 0.2908316571  | 0.2068624301  | 0.2647603607  |
| H | -3.3424946607 | 2.3134165514  | 4.3862262944  |
| H | 2.5669514219  | -5.8179731974 | -0.230946948  |
| H | 3.8921509856  | -4.6782817638 | 0.1077247997  |
| H | 1.0847017547  | 0.1418689157  | -5.6024619961 |
| H | -0.734080965  | 0.0305817711  | -5.6944978045 |
| H | -5.9047750374 | 2.8596324644  | -0.6937479622 |
| N | 2.7013535081  | 4.9202003372  | 2.3868641266  |
| C | 1.8341250179  | 3.9601616432  | 1.7052795535  |
| C | 1.5311194217  | 4.3590602566  | 0.2304092006  |
| O | 1.9921230781  | 5.3891433202  | -0.2589401711 |

|   |               |               |               |
|---|---------------|---------------|---------------|
| C | 0.5279234507  | 3.8036090056  | 2.4871618807  |
| O | -0.2550127923 | 5.00365023    | 2.285996956   |
| H | 2.2442726664  | 5.8377298866  | 2.3182930219  |
| H | 2.3320822919  | 2.9733274632  | 1.7120523997  |
| H | -0.0337039574 | 2.9117670499  | 2.1515170217  |
| H | 0.7808764881  | 3.6831272156  | 3.5560347695  |
| H | -0.9920524505 | 4.9894934058  | 2.923139801   |
| N | 0.6782719229  | 3.5306138123  | -0.4564582318 |
| C | 0.1497017156  | 3.9101817169  | -1.7555638856 |
| C | -1.0870793397 | 4.8317236613  | -1.7542771504 |
| O | -1.6576133728 | 5.0869623243  | -2.816154441  |
| H | 0.3867220407  | 2.6350121295  | -0.0581554101 |
| H | 0.9327505149  | 4.4484420797  | -2.3142321866 |
| H | -0.1156053064 | 3.006882263   | -2.3243006661 |
| N | -1.4850004709 | 5.3219689644  | -0.5474056558 |
| H | -0.9443278523 | 5.2020690128  | 0.3161058333  |
| H | -2.213715913  | 6.0315259942  | -0.5653090491 |
| H | 3.5609153719  | 5.0225962753  | 1.8354025429  |
| N | 8.170992297   | -0.580650599  | 0.0589055854  |
| C | 7.5806545625  | 0.1305288261  | -1.0852497972 |
| C | 6.5743977697  | 1.187402324   | -0.5917851517 |
| C | 5.286824227   | 0.6029522498  | -0.079417086  |
| N | 5.2670969486  | -0.3918094534 | 0.88928803    |
| C | 3.9891231715  | 0.9103227254  | -0.4519753232 |
| C | 3.9847734111  | -0.6674182182 | 1.0889992464  |
| N | 3.1687170137  | 0.0944730154  | 0.3047567057  |
| H | 7.3958303702  | -0.9359636894 | 0.6365447485  |
| H | 7.0609019767  | -0.5269965552 | -1.8211197086 |
| H | 7.0716678789  | 1.7716582743  | 0.2055486018  |
| H | 6.345402953   | 1.8890124186  | -1.412687486  |
| H | 3.5835376901  | 1.6213473576  | -1.1679628171 |
| H | 3.5939608956  | -1.409611008  | 1.783408423   |
| H | 2.1333680445  | 0.0621294028  | 0.2719073705  |
| H | 8.6974716122  | -1.3936320453 | -0.2790147171 |
| H | 8.3935098341  | 0.6428603227  | -1.6343899986 |
